# Supplementary material for: Are emergency admissions in palliative cancer care always necessary? Results from a descriptive study
Source: PubMed Central journal article supplement — BMJ Open. 2013 May 30;3(5):e002515. doi: 10.1136/bmjopen-2012-002515 (PMC3669727; doi:10.1136/bmjopen-2012-002515), 2013-05-30
Supplement: bmjopen-2012-002515.draft_revisions.pdf [file bmjopen-2012-002515.draft_revisions.pdf]

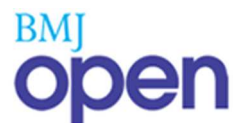

**Emergency admissions in palliative care may not always be necessary. Results from a descriptive study**

|                                 |                                                                                                                                                                                                                                                                                                                                                                                                                                                                                                                                              |
|---------------------------------|----------------------------------------------------------------------------------------------------------------------------------------------------------------------------------------------------------------------------------------------------------------------------------------------------------------------------------------------------------------------------------------------------------------------------------------------------------------------------------------------------------------------------------------------|
| Journal:                        | <i>BMJ Open</i>                                                                                                                                                                                                                                                                                                                                                                                                                                                                                                                              |
| Manuscript ID:                  | bmjopen-2012-002515                                                                                                                                                                                                                                                                                                                                                                                                                                                                                                                          |
| Article Type:                   | Research                                                                                                                                                                                                                                                                                                                                                                                                                                                                                                                                     |
| Date Submitted by the Author:   | 19-Dec-2012                                                                                                                                                                                                                                                                                                                                                                                                                                                                                                                                  |
| Complete List of Authors:       | Hjermstad, Marianne; Regional Centre for Excellence in Palliative Care, Department of Oncology<br>Kolflaath, Jan; Østfold Hospital Trust, Department of Anaesthesiology<br>Løkken, Aud; Østfold Hospital Trust, Department of Anaesthesiology<br>Hanssen, Sjur; Regional Centre for Excellence in Palliative Care, Department of Oncology<br>Normann, Are; Lovisenberg Deaconal Trust, Hospice Lovisenberg<br>Aass, Nina; University of Oslo, Faculty of Medicine; Regional Centre for Excellence in Palliative Care, Department of Oncology |
| <b>Primary Subject Heading</b>: | Oncology                                                                                                                                                                                                                                                                                                                                                                                                                                                                                                                                     |
| Secondary Subject Heading:      | Palliative care                                                                                                                                                                                                                                                                                                                                                                                                                                                                                                                              |
| Keywords:                       | ONCOLOGY, Adult oncology < ONCOLOGY, Cancer pain < ONCOLOGY, PALLIATIVE CARE, Adult palliative care < PALLIATIVE CARE                                                                                                                                                                                                                                                                                                                                                                                                                        |
|                                 |                                                                                                                                                                                                                                                                                                                                                                                                                                                                                                                                              |

SCHOLARONE™  
Manuscripts

Only

1  
2  
3  
4  
5  
6  
7  
8  
9  
10  
11  
12  
13  
14  
15  
16  
17  
18  
19  
20  
21  
22  
23  
24  
25  
26  
27  
28  
29  
30  
31  
32  
33  
34  
35  
36  
37  
38  
39  
40  
41  
42  
43  
44  
45  
46  
47  
48  
49  
50  
51  
52  
53  
54  
55  
56  
57  
58  
59  
60

For peer review only

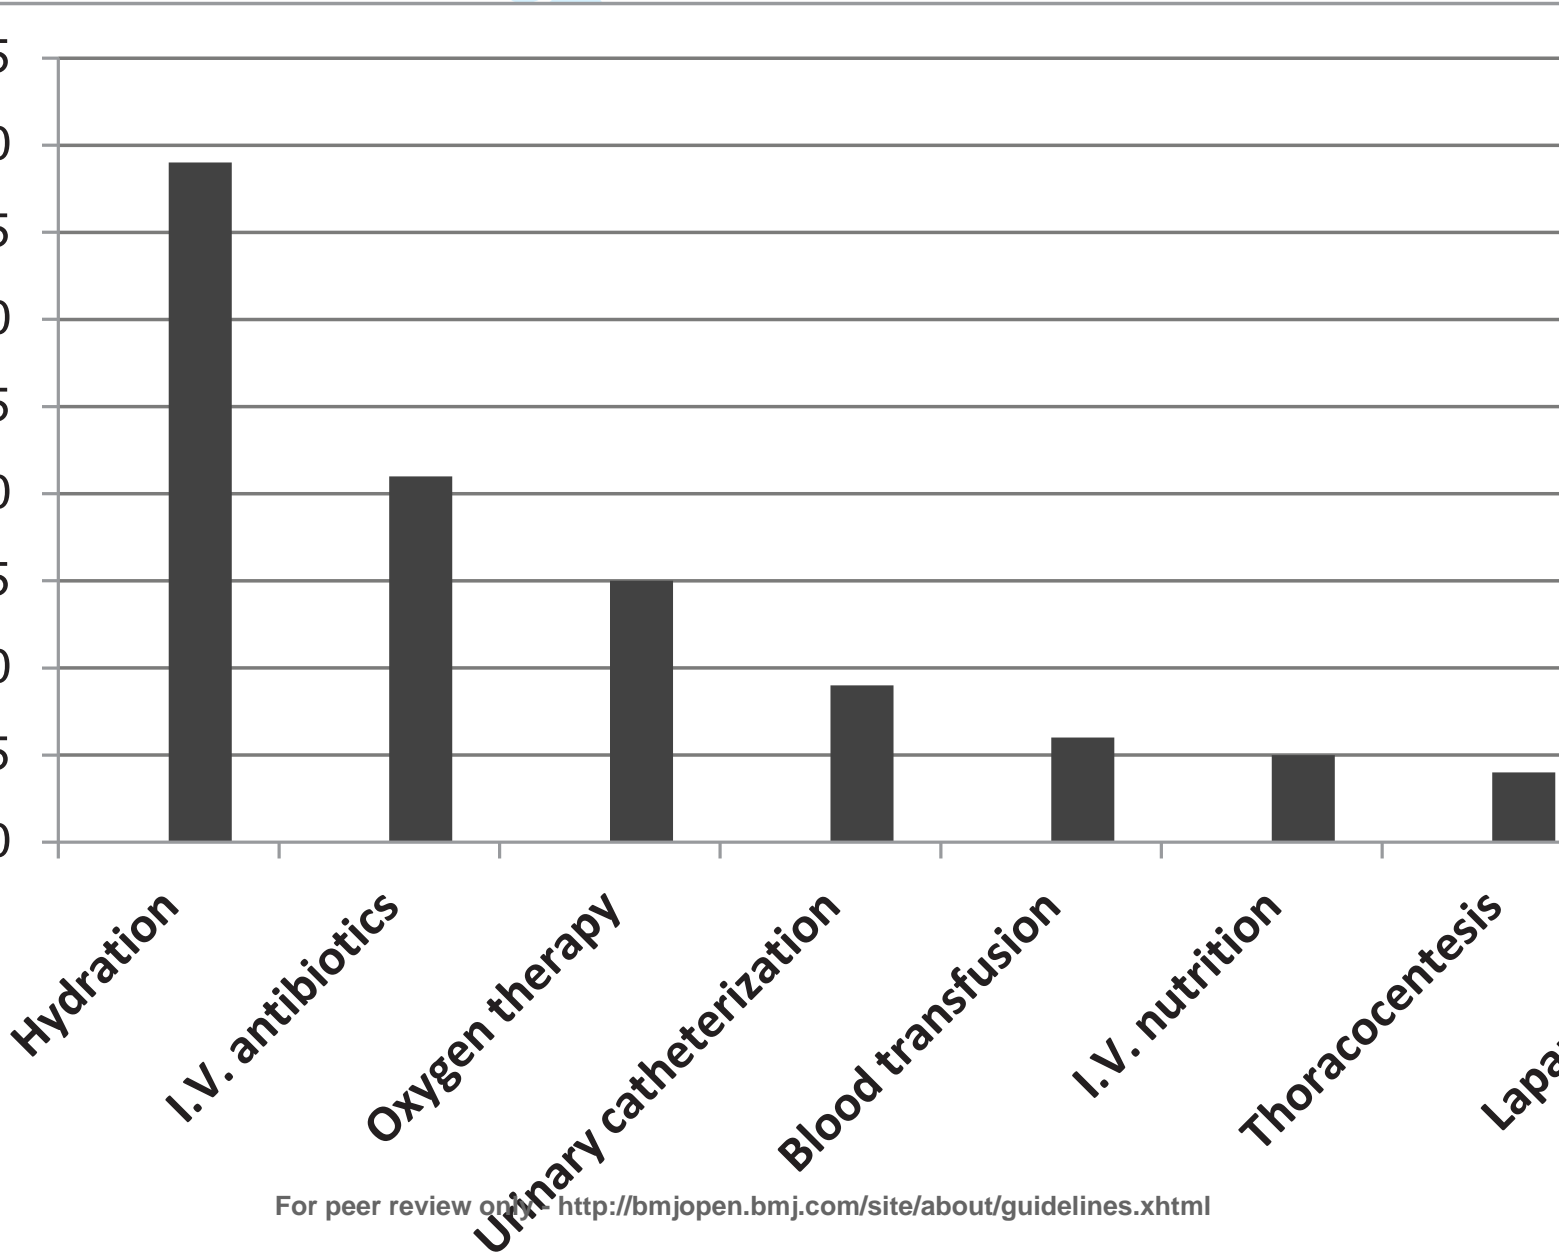

1  
2  
3  
4  
5 **Emergency admissions in palliative care may not always be necessary.**

6  
7 **Results from a descriptive study**

8  
9  
10  
11 **Marianne Jensen Hjermstad<sup>a,b</sup>, Jan Kolflaath<sup>c</sup>, Aud O. Løkken<sup>c</sup>, Sjur B. Hanssen<sup>a</sup>, Are**  
12 **Normann<sup>d</sup>, Nina Aass<sup>a,e</sup>**

13  
14  
15  
16 <sup>a</sup> Regional Centre for Excellence in Palliative Care, Department of Oncology, Oslo University  
17 Hospital, Oslo, Norway

18 <sup>b</sup> European Palliative Care Research Centre, Department of Cancer Research and Molecular  
19 Medicine, Faculty of Medicine, Norwegian University of Science and Technology,  
20 Trondheim, Norway

21 <sup>c</sup> Department of Anaesthesiology, Østfold Hospital Trust, Fredrikstad, Norway

22 <sup>d</sup> Hospice Lovisenberg, Lovisenberg Deaconal Hospital, Oslo, Norway

23 <sup>e</sup> Faculty of Medicine, University of Oslo, Oslo, Norway

24  
25  
26  
27  
28  
29  
30  
31  
32  
33  
34  
35  
36 **Corresponding author**

37 Marianne Jensen Hjermstad

38 Regional Centre for Excellence in Palliative Care, Department of Oncology

39 Oslo University Hospital, Ullevål

40 BOX 4956, Nydalen, 0424 Oslo, Norway

41 E-mail: marianne.j.hjermstad@ntnu.no

42 Telephone number: +47 23 02 68 28, Fax number: +47 22 11 80 75

43  
44  
45  
46  
47  
48  
49  
50  
51 WORDS: 3634 with all headings and headlines, 30 references, 1 figure, 2 tables

52  
53  
54 RUNNING HEAD: Palliative care emergency admissions

55  
56  
57 KEY WORDS: Palliative care, emergency admissions, symptom management, cancer,  
58 continuity of care

## ABSTRACT

**Objectives.** Patients with advanced cancer are often admitted to hospital as emergency cases. This may not always be medically indicated. Study objectives were to register the reasons for the emergency admittances, to examine interventions performed during hospitalization and self-reported symptom intensity at admission and discharge, and to assess patients' opinions about the admission. **Design.** This was a descriptive, before-and-after study. Participating patients completed the Edmonton Symptom Assessment System (ESAS) twice; upon hospital admission and prior to discharge. All patients underwent a structured interview assessing their opinion about the emergency admission. Medical data was obtained from hospital records. **Setting.** The study was performed in two Norwegian acute care secondary hospitals with urban catchment areas. **Participants.** Forty-four cancer patients (M: 27/F: 17, mean age 69.7, SD: 9.2) representing 50 emergency admissions were included. **Results.** Median length of stay was 7 days (95% CI; 7.4-11.4). Median survival was 50 days (95% CI; 51-115). Ninety per cent were admitted from home, and 46% had been hospitalized less than one month earlier. Lung symptoms, nausea/vomiting, and pain were the most frequent reasons for admittance. Mean pain scores on the ESAS were reduced by 50% from admission to discharge ( $p < 0.01$ ). Simple interventions such as hydration, bladder catheterization and oxygen therapy were most frequent. Nearly one-third would have preferred treatment at another site, given that the quality of care was similar. Home visits by the family doctor and specialized care teams were perceived by patients as important to prevent hospitalization. **Conclusion.** In most emergency admissions, relatively simple medical interventions are necessary. Specialized care teams with palliative care physicians, easier access to the family doctor and better lines of cooperation between hospitals and the primary care sector, may make it possible to perform more of these procedures at home, thereby reducing the need for emergency hospitalization.

## Article Summary

### Article focus

- Investigate the reasons for emergency admissions of palliative care cancer patients
- Register interventions performed in the hospital
- Examine symptom intensity before and after medical interventions by a standardized self-report tool (ESAS)

### Key messages

- Palliative care emergencies not always necessary, nor strictly medically indicated
- Simple medical procedures in the home care setting may reduce the need for emergency admissions
- Increased level of competence in the primary health care sector is necessary to prevent hospitalization

### Strengths and limitations of this study

#### Strengths

All potentially eligible patients were assessed  
Registrations were done prospectively, with a thorough examination of charts after discharge / death, the latter that was also assessed retrospectively  
Patients' own experiences were registered

#### Limitations

Small study, in two hospitals only, may reduce overall generalizability  
No registration of ECOG/Karnofsky score upon admission

---

## INTRODUCTION

Thanks to modern, multimodal therapy, survival has improved for many cancer diagnoses. Slightly less than 50% of the patients will die from their cancer[1] while the remaining half will live with the disease for shorter or longer periods of time[2]. This accentuates the need for optimal symptom management and maintenance of quality of life throughout the disease trajectory.

Admissions to the intensive care unit and number of visits to the emergency room (ER) are quality indicators in end of life care[3]. Although this may be necessary in many cases, it is not always so. A British study examined emergency admissions of cancer patients in an acute care hospital and concluded that close to 50% neither needed nor wanted to be admitted as an

1  
2  
3 emergency[4]. Studies have documented that patients with incurable cancer frequently use  
4  
5 acute care hospitals for acute problems and symptomatic treatment[5,6], particularly so older  
6  
7 cancer patients during their last month of life[6]. A Canadian study showed that 27% of  
8  
9 cancer patients had a visit to the ER in the last two weeks of life[7], in line with reports  
10  
11 demonstrating increasing trends over time[5,8,9].  
12

13  
14  
15  
16 A closer collaboration between oncology and palliative care has been recommended[10,11].  
17  
18 One study reported that systematic implementation of a palliative care integration project  
19  
20 resulted in significantly better documentation of pain, fewer visits to the ER, and fewer  
21  
22 admissions to acute care hospitals[12]. This was consistent with a review showing that home,  
23  
24 hospital, and inpatient specialist palliative care significantly improved symptom control, pain  
25  
26 and anxiety, and reduced hospital admissions[13]. Similar findings were reported from an  
27  
28 RCT in a mixed sample of terminally ill patients who received specialized in-home palliative  
29  
30 care[14]. Another RCT, however, comparing a multi-component intervention and follow-up,  
31  
32 found no reduction in ER visits but significantly better quality of life and mood[15].  
33  
34  
35  
36  
37

38  
39 Emergency admissions often represent stressful events for the patients and their families due  
40  
41 to anxiety, feeling of discontinuity, and logistic problems in an emergency setting that may  
42  
43 increase the waiting time. Having to go to the emergency room for admission may also  
44  
45 conflict with patients' wishes. Based on our experience in palliative medicine, and our interest  
46  
47 in continuity of care in patients with advanced disease, we have conducted a small descriptive  
48  
49 study aiming to aid in the planning of palliative care in two Norwegian acute care local  
50  
51 hospitals. Study aims were to register the reasons for the emergency admittances, to examine  
52  
53 symptom intensity upon admission and discharge and to register the interventions performed  
54  
55 during hospitalization. Patients' opinions about the emergency admission were also assessed.  
56  
57  
58  
59  
60

## MATERIAL AND METHODS

### Patients

The two hospitals were Østfold Hospital Trust (SØF) and Lovisenberg Deaconal Hospital (LDS). SØF is the district general hospital for approximately 277,000 inhabitants in the south-eastern part of Norway. The hospital has specialist health care services in most medical specialities, including oncology and palliative care. LDS is located in the capital, Oslo. It serves as the general hospital for psychiatry and internal medicine including emergency admissions, in one of four city sectors with a catchment area of about 156,000 inhabitants. LDS has a specialized palliative care unit.

The Norwegian health care system is organised with university, regional and local hospitals and widespread community health care services. In the catchment areas of these two hospitals, the home care services had nurses with special training in palliative care, supplemented by experienced physicians who were available on request. Also, all palliative care patients who have had previous contact with the hospitals receive special follow-up from the hospital directly or through the hospitals' ambulant palliative care teams, as necessary. Nevertheless, unplanned hospital admittances in Norway are normally routed through the emergency department, even if the patients have an affiliation with the hospital.

A consecutive sample of cancer patients who were admitted through the emergency departments was included between October 2009 and May 2010. Inclusion criteria were a verified diagnosis of cancer in the palliative phase of disease, documented in the patient chart), anticipated survival less than 1 year and cognitive and physical capacity to complete the study as evaluated by the attending oncologist prior to inclusion, age  $\geq 18$  years, fluency in

1  
2  
3 Norwegian and provision of signed informed consent. Exclusion criteria were treatment with  
4  
5 curative or adjuvant intent, a psychiatric diagnosis and language problems/illiteracy.  
6  
7

## 8 9 **Instruments**

10 Medical and socio-demographic data

11  
12 The CRF encompassed socio-demographic variables (marital and situation, use of home care  
13  
14 etc.), and details about the admission (date, time, reason for and organization of the  
15  
16 admission). Medical data e.g. cancer diagnosis (ICD-10) [16], metastases, on-going or  
17  
18 previous tumour directed treatment, and recent hospital discharges were recorded, as were  
19  
20 medical interventions during hospitalization and details about the discharge. This information  
21  
22 was updated during the stay and after discharge by the study nurses/physicians through  
23  
24 double-checking of the hospitals' patient records and the electronic/written charts. Date of  
25  
26 death was recorded retrospectively based on automatic updates in the hospital records from  
27  
28 the Cause of Death Registry[17].  
29  
30  
31  
32  
33  
34  
35

36 Symptom assessment

37  
38 The Edmonton Symptom Assessment System (ESAS) is one of the most frequently used  
39  
40 symptom assessment tools in palliative cancer care[18], and was developed to monitor the  
41  
42 most common cancer symptoms with minimal patient burden[19]. A Norwegian version of  
43  
44 the ESAS was used. The 0-10 numerical rating scale, ranging from 0 (0=*no symptom,*  
45  
46 *normal/good, 10=worst possible symptom*) was used for the following symptoms; *Pain at*  
47  
48 *rest, pain at movement, tiredness, nausea, shortness of breath, dry mouth (xerostomia),*  
49  
50 *appetite, anxiety/uneasiness, depression/sadness* and the question “ *Overall, how are you*  
51  
52 *feeling today?*” (*Well-being*). Patients were asked to rate their symptoms at the present time.  
53  
54  
55  
56  
57  
58  
59  
60



### Structured patient interview

A short structured interview (nine questions) was developed in order to assess the patients' perceptions about the emergency admittance. First, patients were asked to choose the two most important reasons for the emergency admittance from a list of 16 frequent symptoms/problem areas, supplemented by one open category. They were also asked about the duration of symptom development, how the admittance was organized, who they contacted to get help, who organized the admittance, and how they were transported to the hospital. Four questions were assessing if the admission was in accordance with their desires, if they would have preferred to receive treatment somewhere else, and if so where and finally if they could identify certain interventions that could have prevented the emergency admission. Free comments were encouraged.

### Methods for data collection

Patients were approached shortly after admission, and informed about the study by the study nurses. If the patient consented to participate, ESAS was administered at the earliest convenience. The second ESAS was completed as close to discharge as practically possible. The structured interviews were undertaken 1-3 days after admission. These were performed by two designated specialist nurses in palliative medicine.

### **Ethical Considerations**

The protocol was approved by the Regional Committee for Medical and Health Research Ethics, the Norwegian Social Science Data Services (NSD), the institutional review boards at the two hospitals and was conducted according to the rules of the Helsinki declaration. All participants provided written informed consent prior to study start.

## Statistics

Sample size estimations and power calculations were not performed due to the descriptive nature of the study. Standard descriptive statistics were used and few sub-group comparisons were performed due to the small sample size. Each admission and its related interventions were regarded as independent events. A p-value  $\leq 0.05$  was considered statistically significant. The PASW 18 statistical package was used (SPSS Inc., Chicago, IL, USA).

For peer review only

## RESULTS

### Patients

A total of 44 patients (27 males, 17 females) were included, accounting for 50 emergency admissions. Median age was 66 years (53-89) and 36% of the patients were  $\geq 70$  years. Forty patients (91%) had metastatic disease. The remaining four had lung (n=2) and gastrointestinal cancer (n=2) and were receiving palliative cancer care, due to their complex symptom burden.

One patient was still alive at the time of data analyses. Median survival for the remaining 43 patients was 50 days (range 1-500, 95% CI: 51-115) from the first day of study entry, Table 1.

Five patients died while hospitalized, while median survival for the 38 patients who were discharged was 56 days (range 16-500, 95% CI: 58-128). Nine of these died within the first month. Sixteen patients lived for more than 90 days after discharge, six beyond 180 days, while two patients lived longer than the estimated life expectancy of 1 year.

**Table 1. Socio-demographic and medical characteristics <sup>1</sup>**

|                         |                         | N  | (%)  |
|-------------------------|-------------------------|----|------|
| <b>Sex</b>              | Male                    | 27 | (61) |
|                         | Female                  | 17 | (39) |
| <b>Marital status</b>   | Married/cohabiting      | 32 | (73) |
|                         | Single/widowed/divorced | 11 | (44) |
|                         | Missing                 | 1  | (2)  |
| <b>Living situation</b> | With others             | 32 | (73) |
|                         | Alone                   | 12 | (27) |
| <b>Education</b>        | Compulsory or less      | 17 | (39) |

|                                        |                                                             |               |                                |
|----------------------------------------|-------------------------------------------------------------|---------------|--------------------------------|
|                                        | High school graduate                                        | 15            | (34)                           |
|                                        | College / university                                        | 11            | (25)                           |
|                                        | Missing                                                     | 1             | (2)                            |
| <b>Diagnoses</b>                       | Gastrointestinal                                            | 18            | (41)                           |
|                                        | Lung                                                        | 11            | (25)                           |
|                                        | Urological                                                  | 7             | (16)                           |
|                                        | Other <sup>2</sup>                                          | 8             | (18)                           |
| <b>Metastatic disease</b> <sup>3</sup> | Presence of metastases                                      | 40            | (91)                           |
| <b>Site of metastases</b>              | Liver                                                       | 21            | (48)                           |
|                                        | Lymph nodes                                                 | 17            | (39)                           |
|                                        | Bone                                                        | 13            | (30)                           |
|                                        | Lung                                                        | 12            | (27)                           |
|                                        | Brain                                                       | 7             | (16)                           |
| <b>Tumour-directed treatment</b>       | Ongoing upon admission                                      | 14            | (32)                           |
|                                        |                                                             | <b>Median</b> | <b>(range)</b>                 |
| <b>Age</b>                             |                                                             | 67.5          | (53-89)                        |
| <b>Survival</b>                        | Overall survival <sup>4</sup> , days from first study entry | 50            | (1-500,<br>95% CI: 51-<br>115) |

<sup>1</sup> N = 44, the number of individual patients accounting for the 50 emergency admissions

<sup>2</sup> Breast (3), malignant melanoma (2), gynaecological (2), unspecified (1)

<sup>3</sup> Percentages exceed 100, because due to multiple sites per patients

<sup>4</sup> N=43, one patient was still alive at follow-up

### **The emergency admissions**

According to the patients' charts, the single primary reasons for admittance were gastrointestinal problems (n=15), dyspnoea (n=14) and pain (n=7) although the majority of the patients had multiple symptoms. 50% of the emergency admissions were administered by a hospital doctor, and 24% by the patient's general practitioner (GP) or a GP on call. In 45 cases (90%), patients were admitted from home, four patients came from the hospitals' out-patient clinic, and one from a nursing home. Forty-eight per cent were transported by ambulance. In seven cases, an "open return" was established as part of the patient's care plan. However, only two patients were admitted directly to the appropriate hospital unit upon admission, while the remaining had to wait in the emergency room for up to seven hours. Twenty-three patients (46%) had been discharged from hospital less than one month prior to the actual admission.

The highest number of emergencies, 18 of 50, occurred on Mondays. Overall, 19 (38%) of the admissions took place outside regular working hours, defined as 8 p.m. to 5 a.m. on weekdays. Fourteen of these occurred from Friday night through Sunday.

Median length of stay was seven days (1-35). Most discharges (64%) were to the patient's home, eight patients (18%) were discharged to a nursing home, while four were transferred to another hospital or a specialized palliative care unit. According to the admission letters and patient charts, the most frequent reasons for hospitalization were pain (n=9), nausea/vomiting (n=9), pneumonia, lung symptoms including dyspnoea (n=13) and reduced performance status (n=5).

### **Examinations and interventions**

1  
2  
3 X-ray, CT-scans and ultra-sound examinations were performed in 66, 48 and 24% of the cases  
4  
5 respectively, four patients underwent an MRI and seven patients had an electrocardiogram  
6  
7 taken during their stay. Four patients went through surgical procedures; abdominal surgery  
8  
9 (n=1), and insertion of stents (n=2) and a central venous catheter (n=1).

10  
11 Several standard procedures were performed during hospitalization, with hydration (78%),  
12  
13 antibiotics (42%), and oxygen therapy (30%) as the most frequent, Figure 1. Maximum of  
14  
15 registered procedures per patient was twelve, while the minimum was three.

16  
17  
18 About one-third of the patients were seen by an oncologist, while more than 50% were  
19  
20 approached by the hospital palliative team.  
21

22  
23  
24  
25 **Figure 1. Most frequent standard procedures during hospitalization (file uploaded**  
26 **separately)**  
27

28  
29  
30 Pain was prominent, and pain-related procedures were performed in all but seven cases. The  
31  
32 main reasons for admittance in these cases were dyspnoea (n=3), reduced performance status  
33  
34 (n=2), and problems swallowing (n=2). Two-thirds used strong analgesics such as morphine,  
35  
36 fentanyl, or oxycodon upon admission, mostly as depot tablets or patches.

37  
38 The most frequent pain related interventions were changes in the analgesic regimen (n=24)  
39  
40 such as opioid rotation, adding a drug or increasing the dosage. Two patients had an epidural  
41  
42 catheter inserted; one of these also had a coeliacus blockage, and a spinal catheter.  
43  
44

45  
46  
47 **Symptom assessment, ESAS scores**  
48

49  
50 Both ESAS forms were completed in 76% of the cases. Missing forms were due to death  
51  
52 (n=5), discharge earlier than planned and administrative failure (n=7).  
53  
54  
55  
56  
57  
58  
59  
60

Median number of days from admission to the first ESAS was 1 (0-3), with a median of 5 days between assessments (1-20). ESAS no. 2 was completed shortly before discharge; same day (48%) or the day before (12%).

Table 2 displays the ESAS mean scores at inclusion and discharge. Pain at rest and pain at movement was significantly reduced during the stay, with a reduction of 1.7 for both between assessments (p-values <0.01). Highest mean intensity scores at inclusion were found with tiredness (6.1), appetite (5.6) and oral dryness/xerostomia (5.1). Upon discharge, six patients reported a score above three for pain at rest, while 11 patients had a pain score exceeding three for pain at movement.

**Table 2. ESAS scores at inclusion and prior to discharge<sup>1</sup>**

|                                       | <b>1<sup>st</sup><br/>assessment<sup>2</sup></b> | <b>2<sup>nd</sup><br/>assessment<sup>2</sup></b> | <b>Difference in<br/>mean scores<br/>1<sup>st</sup> and 2<sup>nd</sup> ESAS</b> | <b>p-<br/>value</b> |
|---------------------------------------|--------------------------------------------------|--------------------------------------------------|---------------------------------------------------------------------------------|---------------------|
| <b>Symptom</b>                        | <b>Mean (SD)</b>                                 | <b>Mean (SD)</b>                                 |                                                                                 |                     |
| Pain at rest                          | 3.2 (2.8)                                        | 1.5 (1.9)                                        | 1.7                                                                             | <.01                |
| Pain at movement                      | 4.4 (3.1)                                        | 2.7 (2.7)                                        | 1.7                                                                             | <.01                |
| Tiredness                             | 6.1 (2.5)                                        | 5.5 (2.6)                                        | 0.6                                                                             | NS                  |
| Nausea                                | 1.7 (2.5)                                        | 1.3 (2.0)                                        | 0.4                                                                             | NS                  |
| Shortness of breath                   | 3.0 (2.9)                                        | 2.8 (3.2)                                        | 0.2                                                                             | NS                  |
| Oral dryness (xerostomia)             | 5.1 (2.7)                                        | 5.2 (2.6)                                        | -0.1                                                                            | NS                  |
| Appetite                              | 5.6 (2.9)                                        | 5.0 (2.4)                                        | 0.6                                                                             | NS                  |
| Anxiety/uneasiness                    | 1.9 (2.5)                                        | 2.3 (2.7)                                        | -0.4                                                                            | NS                  |
| Depression/sadness                    | 2.3 (2.7)                                        | 2.9 (3.0)                                        | -0.6                                                                            | NS                  |
| “Overall, how are you feeling today?” | 4.5 (2.3)                                        | 4.2 (2.1)                                        | 0.3                                                                             | NS                  |

<sup>1</sup> Numerical rating scale (0-10) with higher scores implying higher symptom intensity

1  
2  
3 <sup>2</sup> N varies between 38 and 34, due to missing items on some of the forms  
4  
5

6  
7 Mean ESAS scores at inclusion in the 12 cases in which the second form was not completed  
8  
9 were compared with scores from those who completed both. No significant differences were  
10  
11 found.  
12

### 13 14 15 **The patient interviews** 16

17  
18 Patients were asked to mention the two most bothersome symptoms leading to the  
19  
20 hospitalization. Gastrointestinal symptoms including appetite loss (n=24), fatigue (n=19), pain  
21  
22 (n=18), and dyspnoea (n=10) were the most frequent reasons according to the patients. In  
23  
24 most cases (64%), patients said the symptoms had developed over several days, and this was  
25  
26 reported by all of those who were admitted on a Monday. Six patients reported a more acute  
27  
28 onset with symptoms developing during a few hours. Four of these patients came to the  
29  
30 hospital outside normal working hours. Nineteen patients received regular medical care at  
31  
32 home from the community health system, such as nursing services and practical help with  
33  
34 household chores, or both. When asked about preference for care the majority of patients  
35  
36 (66%) preferred hospital admission to other places in the actual situation. Nine (18%) said  
37  
38 they would have liked to receive medical treatment at home, given that necessary resources  
39  
40 and equipment were available.  
41  
42  
43  
44  
45

46  
47 Free comments were provided in 44 interviews. Seven patients perceived the delays in the  
48  
49 emergency unit as tiring and unnecessary, while another seven found this acceptable. Two  
50  
51 patients specifically stated that they would have preferred direct admission to the appropriate  
52  
53 hospital unit, while another two had a desire to go directly to the palliative care unit. In ten  
54  
55 interviews, patients said they felt safer at hospital than at home given the actual situation.  
56  
57 Seven of these were 65 years or older, but only one was living alone. However, some  
58  
59  
60



1  
2  
3 expressed concerns about the caregiver burden imposed on their partner. The most frequently  
4 raised comment in the interviews was related to doubts whether the home care services had  
5 competence and expertise to handle the situation. Nevertheless, many patients said they would  
6 have preferred to get simple procedures such as intravenous nutrition and hydration at home.  
7  
8 In their opinion, specialized care teams and home visits by their GP were the most important  
9 actions to prevent emergency admissions.  
10  
11  
12  
13  
14  
15  
16  
17

## 18 **DISCUSSION**

19  
20  
21 This small, descriptive study from two acute-care Norwegian hospitals serving local, urban  
22 areas shows that relatively simple procedures were performed in most of the emergency cases.  
23  
24 Standard interventions such as hydration, antibiotics, and oxygen therapy were most common,  
25 corresponding well with the most frequent reasons for admission. In many cases, these  
26 procedures may well be administered in the primary health care sector.  
27  
28  
29

30  
31  
32 Pain, gastro-intestinal and respiratory problems were prominent, well in line with other  
33 studies of emergency admissions[4,20,21]. These are frequent symptoms in advanced cancer  
34 patients, and may indicate disease progression. One study demonstrated a significant  
35 relationship between signs of disease progression and short term mortality (<90 and <180  
36 days) in symptomatic cancer patients coming to the ER[21], in line with other reports[22,23].  
37  
38 Although the present study was too small to perform valid analyses of a possible relationship  
39 between symptoms and survival, our sample consisted of cancer patients in the palliative  
40 phase of disease, and more than 50% were dead 90 days after discharge. This suggests that  
41 standard medical procedures were indicated for most of the patients, and more advanced  
42 procedures in some cases only.  
43  
44  
45  
46  
47  
48  
49  
50  
51  
52  
53  
54  
55  
56  
57  
58  
59  
60

1  
2  
3 Thirty-eight per cent of the admissions were outside normal working hours, a lower  
4 proportion than reported elsewhere[20]. In most cases, patients said that symptoms had  
5 developed over time. Monday had the highest percentage of emergency admissions as found  
6 by others[20], which corresponds to a gradual onset of symptoms, as reported by all of the  
7 patients admitted on Mondays. It may also be that patients tried to avoid going in on  
8 weekends and waited until Monday before contacting the hospital or the GP.  
9  
10  
11  
12  
13  
14  
15  
16  
17

18 Many common symptoms are bothersome and distressing and known to cause considerable  
19 anxiety in patients, and in relatives. Thus, it should be remembered that causes other than  
20 strict medical, somatic indications may lead to hospital admissions, e.g. reduced performance  
21 status, frailty, loneliness and psychological distress that often coexist. Some patients  
22 commented that they felt safer at hospital than at home, and that they wanted to reduce the  
23 burden imposed on their family by the disease. Causes like this may be more common in  
24 smaller hospitals serving a well-defined area compared to larger university clinics. In our  
25 opinion, maybe the most important issue raised by this study is not whether hospital  
26 admission was indicated per se, but if hospital admission as an emergency case was most  
27 appropriate for getting necessary medical care. We also believe however, that a higher level  
28 of specialist palliative care competence in the home care services and closer collaboration  
29 between these services and the hospital may reduce the need for emergency admittances.  
30  
31  
32  
33  
34  
35  
36  
37  
38  
39  
40  
41  
42  
43  
44  
45  
46  
47

48 This also relates to the fact that about 50% of the admissions were administered by a hospital  
49 doctor, twice as many as by GPs (24%). The standard pathway for hospital admissions in  
50 Norway is through the family GP, unless there is an emergency. The fact that our sample  
51 consisted of palliative care patients with an affiliation to the local hospital, may explain why  
52 the hospital doctors were so frequently contacted. It is noteworthy, however, that a home visit  
53  
54  
55  
56  
57  
58  
59  
60

1  
2  
3 by a medical doctor was mentioned as the most wanted intervention that could possibly have  
4 prevented the emergency admission. Shorter hospital stays and more people living longer at  
5 home with advanced disease, represent a challenge for the primary health care sector,  
6 specifically so for the GPs[24,25] as they are crucial in the follow-up and care for patients  
7 with advanced cancer outside hospital[26]. One study found that a higher number of visits to  
8 the family doctor was inversely associated with the number of visits to the ER in patients  
9 dying from cancer[27].  
10  
11  
12  
13  
14  
15  
16  
17  
18  
19

20  
21 In our opinion, this points to two important aspects related to palliative care; namely that it is  
22 misconstrued as end-of-life care only[10], and that it should be integrated into standard  
23 oncology upon the diagnosis of metastatic or advanced cancer. WHO emphasize that  
24 palliative care is applicable early in the course of illness[28] due to systematic approach to  
25 symptom relief, enhanced quality of life of patient and caregivers, less use of emergency care  
26 services and a timelier referral to specialized palliative care, that often takes place too  
27 late[11,20,29].  
28  
29  
30  
31  
32  
33  
34  
35  
36  
37

38 The fact that many patients with advanced cancer see acute-care providers, makes systematic  
39 follow-up less common, and means that collaborative care plans across organizational levels  
40 are not available, even if needed. Home care of patients with advanced cancer should be taken  
41 care of by specialist teams with easy access to hospital based palliative care specialists, in  
42 close collaboration with the family doctor. Pain related interventions were performed in  
43 almost all patients, and there was a significant decline in the mean pain scores (mean 1.7) on  
44 the ESAS from admission to discharge. A recent study in more than 200 patients showed that  
45 a decrease of 1.2 units in the ESAS pain score constituted a clinically relevant  
46 improvement[30]. A change in the analgesic regimen was the most frequent procedure, and it  
47  
48  
49  
50  
51  
52  
53  
54  
55  
56  
57  
58  
59  
60

1  
2  
3 is reason to believe that this and other simple procedures could have been performed at home,  
4  
5 if the resources in the form of necessary competence were available. This may reduce the  
6  
7 dependency on the local hospital and reduce the number of emergency admissions.  
8  
9

10  
11 One limitation is the lack of information about performance status and current disease status  
12  
13 at admission, both important predictors of survival and disease progression[21]. This might  
14  
15 have provided more valid information about the necessity of being admitted as an emergency  
16  
17 case. The majority of patients had metastatic disease and few received tumour-directed  
18  
19 treatment upon admission, indicating that the majority were in the late stages of disease.  
20  
21 Additionally, lung symptoms, reported as an independent predictor of death within 90 and 180  
22  
23 days[21-23] were among the most frequent reasons for admission. Although some patients  
24  
25 needed more advanced procedures (surgery, MRIs and EKGs), relatively simple procedures  
26  
27 like hydration and change in analgesia were most common. This may be taken to indicate that  
28  
29 an emergency hospital admission was necessary for some patients, but not for all. To perform  
30  
31 a valid investigation of the proportion of patients needing emergency care, a larger study with  
32  
33 thorough objective examinations and follow-up is necessary, which was beyond the scope of  
34  
35 this descriptive study. We did not register the amount and quality of care delivered by the  
36  
37 home care nursing services, nor the frequency of follow-up by the patients' GP. Another  
38  
39 limitation is the small sample size and that the study was confined to two hospitals only. The  
40  
41 first does not allow for advanced statistics and sub-group comparisons, while the second may  
42  
43 limit the generalizability. On the other hand, there are many relatively small acute care  
44  
45 hospitals in Norway as in many other countries, rendering the findings relevant to consider in  
46  
47 discharge planning and palliative care follow-up. Also, the fact that all consecutive  
48  
49 emergency cases in the actual time period were considered for inclusion is a major strength, in  
50  
51  
52  
53  
54  
55  
56  
57  
58  
59  
60

1  
2  
3 our opinion. Furthermore, quantitative registrations combined with interviews give a good  
4  
5 picture of patient experiences.  
6  
7

8  
9  
10 The fact that close to 50% of our patients had been discharged from hospital less than one  
11  
12 month prior to the actual admission emphasizes the need to improve the continuity of care,  
13  
14 through a systematic follow-up and treatment plan, which are cornerstones of palliative care.  
15  
16 This may actually have a double effect, preventing a rapid development in symptom intensity  
17  
18 and improving the feeling of safety for patients and family, thereby reducing the need for  
19  
20 emergency admissions.  
21  
22

## 23 24 25 **CONCLUSION** 26

27  
28 Emergency admissions may represent stressful events for patients and relatives. This study  
29  
30 showed that many patients needed simple procedures only. About two-thirds preferred  
31  
32 hospital admission to other places of care, and the feeling of being safe in hospital was  
33  
34 prominent. Higher levels of expertise, easier access to medical doctors outside hospital and  
35  
36 better lines of cooperation between hospitals and the primary health care services may reduce  
37  
38 need for emergency hospitalizations.  
39  
40

## 41 42 43 **ACKNOWLEDGEMENTS** 44

45  
46 This project was supported in part by a grant from the Department of Research at Ostfold  
47  
48 Hospital Trust, Norway. The authors want to thank Marit S. Jordhøy, Norway, who gave  
49  
50 valuable advice in the protocol and manuscript writing, and Irmelin Bergh who helped out in  
51  
52 the initial phase of the study planning. Special thanks are also given to the study coordinators  
53  
54 at the participating centres and the patients who took part in the study.  
55  
56  
57  
58  
59  
60

1  
2  
3  
4  
5  
6  
7  
8  
9  
10  
11  
12  
13  
14  
15  
16  
17  
18  
19  
20  
21  
22  
23  
24  
25  
26  
27  
28  
29  
30  
31  
32  
33  
34  
35  
36  
37  
38  
39  
40  
41  
42  
43  
44  
45  
46  
47  
48  
49  
50  
51  
52  
53  
54  
55  
56  
57  
58  
59  
60

For peer review only

## REFERENCES

1. Krefregisteret, Cancer Registry of Norway. Homepage: <http://www.krefregisteret.no/en/>. (2011, Accessed Nov 2012)
2. Verdecchia A, Francisci S, Brenner H, et al. Recent cancer survival in Europe: a 2000-02 period analysis of EURO CARE-4 data. *Lancet Oncol* 2007;**9**:784-796.
3. Earle CC, Park ER, Lai B, et al. Identifying potential indicators of the quality of end-of-life cancer care from administrative data. *J Clin Oncol* 2003;**21**:1133-1138.
4. Yates M, Barrett A. Oncological emergency admissions to the Norfolk and Norwich University Hospital: an audit of current arrangements and patient satisfaction. *Clin Oncol (R Coll Radiol)* 2009;**3**:226-233.
5. Earle CC, Neville BA, Landrum MB, et al. Trends in the aggressiveness of cancer care near the end of life. *J Clin Oncol* 2004;**2**:315-321.
6. Huang J, Boyd C, Tyldesley S, et al. Time spent in hospital in the last six months of life in patients who died of cancer in Ontario. *J Clin Oncol* 2002;**6**:1584-1592.
7. Barbera L, Paszat L, and Chartier C. Indicators of poor quality end-of-life cancer care in Ontario. *J Palliat Care* 2006;**1**:12-17.
8. Ho TH, Barbera L, Saskin R, et al. Trends in the aggressiveness of end-of-life cancer care in the universal health care system of Ontario, Canada. *J Clin Oncol* 2011; **12**: 1587-1591.
9. Earle CC, Landrum MB, Souza JM, et al. Aggressiveness of cancer care near the end of life: is it a quality-of-care issue? *J Clin Oncol* 2008; **23**: 3860-3866.
10. Smith TJ, Temin S, Alesi ER, et al. American society of clinical oncology provisional clinical opinion: the integration of palliative care into standard oncology care. *J Clin Oncol* 2012;**8**:880-887.
11. Bruera E, and Hui D. Integrating supportive and palliative care in the trajectory of cancer: establishing goals and models of care. *J Clin Oncol* 2010; **25**: 4013-4017.
12. Dudgeon DJ, Knott C, Eichholz M, et al. Palliative Care Integration Project (PCIP) quality improvement strategy evaluation. *J Pain Symptom Manage* 2008;**6**:573-582.
13. Higginson IJ, and Evans CJ. What is the evidence that palliative care teams improve outcomes for cancer patients and their families? *Cancer J* 2010;**5**:423-435.
14. Brumley R, Enguidanos S, Jamison P, et al. Increased satisfaction with care and lower costs: results of a randomized trial of in-home palliative care. *J Am Geriatr Soc* 2007;**7**:993-1000.
15. Bakitas M, Lyons KD, Hegel MT, et al. Effects of a palliative care intervention on clinical outcomes in patients with advanced cancer: the Project ENABLE II randomized controlled trial. *JAMA* 2009;**7**:741-749.

16. International Classification of Diseases ICD-10. Home page: <http://www.who.int/classifications/icd/en/>, (2010, Accessed Nov 2012).
17. Norwegian Cause of Death Registry. Home page: [http://www.ssb.no/english/subjects/03/01/10/dodsarsak\\_en/](http://www.ssb.no/english/subjects/03/01/10/dodsarsak_en/). (2010, Accessed Nov 2012).
18. Nikolaichuk C, Watanabe S, and Beaumont C. The Edmonton Symptom Assessment System: a 15-year retrospective review of validation studies (1991-2006). *Palliat Med* 2008;**2**:111-122.
19. Bruera E, Kuehn N, Miller MJ, et al. The Edmonton Symptom Assessment System (ESAS): a simple method for the assessment of palliative care patients. *J Palliat Care* 1991;**2**:6-9.
20. Mayer DK, Travers D, Wyss A, et al. Why do patients with cancer visit emergency departments? Results of a 2008 population study in North Carolina. *J Clin Oncol* 2011;**19**:2683-2688.
21. Geraci JM, Tsang W, Valdres RV, et al. Progressive disease in patients with cancer presenting to an emergency room with acute symptoms predicts short-term mortality. *Support Care Cancer* 2006;**10**:1038-1045.
22. Escalante CP, Martin CG, Elting LS, et al. Identifying risk factors for imminent death in cancer patients with acute dyspnea. *J Pain Symptom Manage* 2000;**5**:318-325.
23. Vigano A, Dorgan M, Bruera E, et al. The relative accuracy of the clinical estimation of the duration of life for patients with end of life cancer. *Cancer* 1999;**1**:170-176.
24. Menten J, and de Lepeleire J. Emergency hospital admission for pain in palliative patients: a crucial role for general practitioners. *Eur J Gen Pract* 2006;**3**:133-134.
25. Wiese CH, Bartels UE, Ruppert D, et al. Treatment of palliative care emergencies by prehospital emergency physicians in Germany: an interview based investigation. *Palliat Med* 2009;**4**:369-373.
26. Wiese CH, Bartels UE, Marczyńska K, et al. Quality of out-of-hospital palliative emergency care depends on the expertise of the emergency medical team--a prospective multi-centre analysis. *Support Care Cancer* 2009; **12**: 1499-1506.
27. Burge F, Lawson B, and Johnston G. Family physician continuity of care and emergency department use in end-of-life cancer care. *Med Care* 2003;**41**:992-1001.
28. World Health Organization. Homepage <http://www.who.int/cancer/palliative/definition/en/>. (2011, accessed Nov 2012).
29. Daugherty CK, and Steensma DP. Overcoming obstacles to hospice care: an ethical examination of inertia and inaction. *J Clin Oncol* 2003;**21**(9 Suppl):42s-45s.
30. Bedard G, Zeng L, Zhang L, et al. Minimal Clinically Important Differences in the Edmonton Symptom Assessment System in Patients With Advanced Cancer. *J Pain*



1  
2  
3 *Symptom Manage* 2012. Epub ahead of print, Nov 21, doi:  
4 10.1016/j.jpainsymman.2012.07.022.  
5  
6  
7  
8  
9  
10  
11  
12  
13  
14  
15  
16  
17  
18  
19  
20  
21  
22  
23  
24  
25  
26  
27  
28  
29  
30  
31  
32  
33  
34  
35  
36  
37  
38  
39  
40  
41  
42  
43  
44  
45  
46  
47  
48  
49  
50  
51  
52  
53  
54  
55  
56  
57  
58  
59  
60

For peer review only



**Are emergency admissions in palliative cancer care always necessary? Results from a descriptive study**

|                                 |                                                                                                                                                                                                                                                                                                                                                                                                                                                                                                                                              |
|---------------------------------|----------------------------------------------------------------------------------------------------------------------------------------------------------------------------------------------------------------------------------------------------------------------------------------------------------------------------------------------------------------------------------------------------------------------------------------------------------------------------------------------------------------------------------------------|
| Journal:                        | <i>BMJ Open</i>                                                                                                                                                                                                                                                                                                                                                                                                                                                                                                                              |
| Manuscript ID:                  | bmjopen-2012-002515.R1                                                                                                                                                                                                                                                                                                                                                                                                                                                                                                                       |
| Article Type:                   | Research                                                                                                                                                                                                                                                                                                                                                                                                                                                                                                                                     |
| Date Submitted by the Author:   | 01-Mar-2013                                                                                                                                                                                                                                                                                                                                                                                                                                                                                                                                  |
| Complete List of Authors:       | Hjermstad, Marianne; Regional Centre for Excellence in Palliative Care, Department of Oncology<br>Kolflaath, Jan; Østfold Hospital Trust, Department of Anaesthesiology<br>Løkken, Aud; Østfold Hospital Trust, Department of Anaesthesiology<br>Hanssen, Sjur; Regional Centre for Excellence in Palliative Care, Department of Oncology<br>Normann, Are; Lovisenberg Deaconal Trust, Hospice Lovisenberg<br>Aass, Nina; Regional Centre for Excellence in Palliative Care, Department of Oncology; University of Oslo, Faculty of Medicine |
| <b>Primary Subject Heading</b>: | Oncology                                                                                                                                                                                                                                                                                                                                                                                                                                                                                                                                     |
| Secondary Subject Heading:      | Palliative care, Emergency medicine                                                                                                                                                                                                                                                                                                                                                                                                                                                                                                          |
| Keywords:                       | ONCOLOGY, Adult oncology < ONCOLOGY, Cancer pain < ONCOLOGY, PALLIATIVE CARE, Adult palliative care < PALLIATIVE CARE                                                                                                                                                                                                                                                                                                                                                                                                                        |
|                                 |                                                                                                                                                                                                                                                                                                                                                                                                                                                                                                                                              |

SCHOLARONE™  
Manuscripts

only

1  
2  
3  
4  
5  
6  
7  
8  
9  
10  
11  
12  
13  
14  
15  
16  
17  
18  
19  
20  
21  
22  
23  
24  
25  
26  
27  
28  
29  
30  
31  
32  
33  
34  
35  
36  
37  
38  
39  
40  
41  
42  
43  
44  
45  
46  
47  
48  
49  
50  
51  
52  
53  
54  
55  
56  
57  
58  
59  
60

## Are emergency admissions in palliative cancer care always necessary? Results from a descriptive study

Marianne Jensen Hjermsstad<sup>a,b</sup>, Jan Kolflaath<sup>c</sup>, Aud O. Løkken<sup>c</sup>, Sjur B. Hanssen<sup>a</sup>, Are Normann<sup>d</sup>, Nina Aass<sup>a,e</sup>

<sup>a</sup> Regional Centre for Excellence in Palliative Care, Department of Oncology, Oslo University Hospital, Oslo, Norway

<sup>b</sup> European Palliative Care Research Centre, Department of Cancer Research and Molecular Medicine, Faculty of Medicine, Norwegian University of Science and Technology, Trondheim, Norway

<sup>c</sup> Department of Anaesthesiology, Østfold Hospital Trust, Fredrikstad, Norway

<sup>d</sup> Hospice Lovisenberg, Lovisenberg Diakonale Hospital, Oslo, Norway

<sup>e</sup> Faculty of Medicine, University of Oslo, Oslo, Norway

### Corresponding author

Marianne Jensen Hjermsstad

Regional Centre for Excellence in Palliative Care, Department of Oncology

Oslo University Hospital, Ullevål

BOX 4956, Nydalen, 0424 Oslo, Norway

E-mail: marianne.j.hjermsstad@ntnu.no

Telephone number: +47 23 02 68 28, Fax number: +47 22 11 80 75

WORDS: 3942 with all headings and headlines, 31 references, 2 figures, 2 tables

RUNNING HEAD: Palliative care emergency admissions

1  
2  
3  
4 KEY WORDS: Palliative care, emergency admissions, symptom management, cancer,  
5 continuity of care  
6  
7  
8  
9  
10  
11  
12  
13  
14  
15  
16  
17  
18  
19  
20  
21  
22  
23  
24  
25  
26  
27  
28  
29  
30  
31  
32  
33  
34  
35  
36  
37  
38  
39  
40  
41  
42  
43  
44  
45  
46  
47  
48  
49  
50  
51  
52  
53  
54  
55  
56  
57  
58  
59  
60

For peer review only

## ABSTRACT

**Objectives.** Patients with advanced cancer are often admitted to hospital as emergency cases. This may not always be medically indicated. Study objectives were to register the reasons for the emergency admissions, to examine interventions performed during hospitalization and self-reported symptom intensity at admission and discharge, and to assess patients' opinions about the admission.

**Design.** This was a descriptive, before-and-after study. Participating patients completed the Edmonton Symptom Assessment System (ESAS) twice; upon hospital admission and prior to discharge. All patients underwent a structured interview assessing their opinion about the emergency admission. Medical data was obtained from hospital records.

**Setting.** The study was performed in two Norwegian acute care secondary hospitals with urban catchment areas.

**Participants.** Forty-four cancer patients (M: 27/F: 17, mean age 69.2, SD: 9.2) representing 50 emergency admissions were included.

**Results.** Median length of stay was 7 days (95% CI; 7.4-11.4). Median survival was 50 days (95% CI; 51-115). Ninety per cent were admitted from home, and 46% had been hospitalized less than one month earlier. Lung and gastro-intestinal symptoms and pain were the most frequent reasons for admissions. Mean pain scores on the ESAS were reduced by 50% from admission to discharge ( $p < 0.01$ ). Simple interventions such as hydration, bladder catheterization and oxygen therapy were most frequent. Nearly one-third would have preferred treatment at another site, provided that the quality of care was similar. Home visits by the family doctor and specialized care teams were perceived by patients as important to prevent hospitalization.

**Conclusion.** In most emergency admissions, relatively simple medical interventions are necessary. Specialized care teams with palliative care physicians, easier access to the family

1  
2  
3 doctor and better lines of cooperation between hospitals and the primary care sector, may  
4  
5 make it possible to perform more of these procedures at home, thereby reducing the need for  
6  
7 emergency admissions.  
8  
9

## 10 11 **Article Summary**

### 12 **Article focus**

- 13 • Investigate the reasons for emergency admissions of palliative care cancer patients
- 14 • Register interventions performed in the hospital
- 15 • Examine symptom intensity before and after medical interventions by a standardized  
16 self-report tool (ESAS)

### 17 **Key messages**

- 18 • Palliative care emergency admissions not always necessary, nor strictly medically  
19 indicated
- 20 • Simple medical procedures in the home care setting may reduce the need for  
21 emergency admissions
- 22 • Increased level of competence and more specialized palliative care skills in the  
23 primary health care sector is necessary to prevent emergency admissions

### 24 **Strengths and limitations of this study**

#### 25 **Strengths**

26 All potentially eligible patients were assessed  
27 Registrations were done prospectively, with a thorough examination of charts after discharge /  
28 death, the latter that was also assessed retrospectively  
29 Patients' own experiences were registered

#### 30 **Limitations**

31 Small study in two hospitals only, with a limited number of variables, may reduce overall  
32 generalizability  
33 No registration of ECOG/Karnofsky score upon admission

---

## 34 **INTRODUCTION**

35  
36  
37 Thanks to modern, multimodal therapy, survival has improved for many cancer diagnoses.  
38  
39 Slightly less than 50% of the patients will die from their cancer[1] while the remaining half  
40  
41 will live with the disease for shorter or longer periods of time[2]. This accentuates the need  
42  
43 for optimal symptom management and maintenance of quality of life throughout the disease  
44  
45 trajectory.  
46  
47  
48  
49  
50  
51  
52  
53  
54  
55  
56  
57  
58  
59  
60

1  
2  
3  
4  
5 Admissions to the intensive care unit and number of visits to the emergency room (ER) are  
6  
7 quality indicators in end of life care[3]. Although this may be necessary in many cases, it is  
8  
9 not always so. A British study examined emergency admissions of cancer patients in an acute  
10  
11 care hospital and concluded that close to 50% neither needed nor wanted to be admitted as an  
12  
13 emergency[4]. This is in line with a Canadian study examining administrative data on  
14  
15 admissions, concluding that many visits to the emergency department by patients with cancer  
16  
17 near the end of life may be avoidable[5] Studies have documented that patients with incurable  
18  
19 cancer frequently use acute care hospitals for acute problems and symptomatic  
20  
21 treatment[6,7,8], particularly so older cancer patients during their last month of life[7]. A  
22  
23 study from Ontario published in 2006 [8] showed that 27% of cancer patients had a visit to the  
24  
25 ER in the last two weeks of life, corresponding to 34% in a subsequent report (2010)[5], in  
26  
27 line with other reports demonstrating increasing trends over time[6,9,10].  
28  
29  
30  
31  
32  
33

34 A closer collaboration between oncology and palliative care has been recommended[11,12].  
35  
36 One study reported that systematic implementation of a palliative care integration project  
37  
38 resulted in significantly better documentation of pain, fewer visits to the ER, and fewer  
39  
40 admissions to acute care hospitals[13]. This was consistent with a review showing that home,  
41  
42 hospital, and inpatient specialist palliative care significantly improved symptom control, pain  
43  
44 and anxiety, and reduced hospital admissions[14]. Similar findings were reported from an  
45  
46 RCT in a mixed sample of terminally ill patients who received specialized in-home palliative  
47  
48 care[15]. Another RCT, however, comparing a multi-component intervention and follow-up,  
49  
50 found no reduction in ER visits but significantly better quality of life and mood[16].  
51  
52  
53  
54  
55  
56  
57  
58  
59  
60

1  
2  
3 Emergency admissions often represent stressful events for the patients and their families due  
4 to anxiety, feeling of discontinuity, and logistic problems in an emergency setting that may  
5 increase the waiting time. Having to go to the emergency room for admission may also  
6 conflict with patients' wishes. Based on our experience in palliative medicine, and our interest  
7 in continuity of care in patients with advanced disease, we have conducted a small descriptive  
8 study aiming to aid in the planning of palliative care in two Norwegian acute care local  
9 hospitals. Study aims were to register the reasons for the emergency admissions, to examine  
10 symptom intensity upon admission and discharge and to register the interventions performed  
11 during hospitalization. Patients' opinions about the emergency admission were also assessed.  
12  
13  
14  
15  
16  
17  
18  
19  
20  
21  
22  
23  
24

## 25 **MATERIAL AND METHODS**

### 26 **Patients**

27  
28  
29  
30  
31  
32 The two hospitals were Østfold Hospital Trust (SØF) and Lovisenberg Diakonale Hospital  
33 (LDS). SØF is the district general hospital for approximately 277,000 inhabitants in the south-  
34 eastern part of Norway. The hospital has specialist health care services in most medical  
35 specialities, including oncology and palliative care. LDS is located in the capital, Oslo. It  
36 serves as the general hospital for psychiatry and internal medicine including emergency  
37 admissions, in one of four city sectors with a catchment area of about 156,000 inhabitants.  
38  
39 LDS has a specialized palliative care unit.  
40  
41  
42  
43  
44  
45  
46  
47

48 The Norwegian health care system is organised with university, regional and local hospitals  
49 and widespread community health care services. In the catchment areas of these two hospitals,  
50 the home care services had nurses with special training in palliative care, supplemented by  
51 experienced physicians who were available on request. Also, all palliative care patients who  
52 have had previous contact with the hospitals receive special follow-up from the hospital  
53  
54  
55  
56  
57  
58  
59  
60



1  
2  
3 directly or through the hospitals' ambulant palliative care teams, as necessary. The update is  
4 normally adapted and updated according to changing needs. Nevertheless, unplanned hospital  
5 admissions in Norway are normally routed through the emergency department, even if the  
6 patients have a previous affiliation with the hospital. Formal advanced care planning is not  
7 routinely applied in Norway, but elements from such plans are often part of the discussion  
8 with patients and their relatives.  
9  
10  
11  
12  
13  
14  
15  
16  
17

18 A consecutive sample of cancer patients who were admitted through the emergency  
19 departments was included between October 2009 and May 2010. Inclusion criteria were a  
20 verified diagnosis of cancer in the palliative phase of disease, documented in the patient  
21 chart), anticipated survival less than 1 year and cognitive and physical capacity to complete  
22 the study as evaluated by the attending oncologist prior to inclusion, age  $\geq 18$  years, fluency in  
23 Norwegian and provision of signed informed consent. Exclusion criteria were treatment with  
24 curative or adjuvant intent, a psychiatric diagnosis and language problems/illiteracy.  
25  
26  
27  
28  
29  
30  
31  
32  
33  
34  
35

### 36 **Instruments**

37  
38 Medical and socio-demographic data

39  
40 The CRF encompassed socio-demographic variables (marital and living situation), use of  
41 etc.), and details about the admission (date, time, reason for and organization of the  
42 admission). One dichotomous question (Y/N) asked about the use of different home care  
43 services such as specialized palliative care, generalist home care teams, contact with  
44 community cancer nurse etc., as well as help from family/friends in the last three months.  
45  
46  
47  
48  
49  
50  
51  
52  
53  
54  
55  
56  
57  
58  
59  
60  
61  
62  
63  
64  
65  
66  
67  
68  
69  
70  
71  
72  
73  
74  
75  
76  
77  
78  
79  
80  
81  
82  
83  
84  
85  
86  
87  
88  
89  
90  
91  
92  
93  
94  
95  
96  
97  
98  
99  
100  
101  
102  
103  
104  
105  
106  
107  
108  
109  
110  
111  
112  
113  
114  
115  
116  
117  
118  
119  
120  
121  
122  
123  
124  
125  
126  
127  
128  
129  
130  
131  
132  
133  
134  
135  
136  
137  
138  
139  
140  
141  
142  
143  
144  
145  
146  
147  
148  
149  
150  
151  
152  
153  
154  
155  
156  
157  
158  
159  
160  
161  
162  
163  
164  
165  
166  
167  
168  
169  
170  
171  
172  
173  
174  
175  
176  
177  
178  
179  
180  
181  
182  
183  
184  
185  
186  
187  
188  
189  
190  
191  
192  
193  
194  
195  
196  
197  
198  
199  
200  
201  
202  
203  
204  
205  
206  
207  
208  
209  
210  
211  
212  
213  
214  
215  
216  
217  
218  
219  
220  
221  
222  
223  
224  
225  
226  
227  
228  
229  
230  
231  
232  
233  
234  
235  
236  
237  
238  
239  
240  
241  
242  
243  
244  
245  
246  
247  
248  
249  
250  
251  
252  
253  
254  
255  
256  
257  
258  
259  
260  
261  
262  
263  
264  
265  
266  
267  
268  
269  
270  
271  
272  
273  
274  
275  
276  
277  
278  
279  
280  
281  
282  
283  
284  
285  
286  
287  
288  
289  
290  
291  
292  
293  
294  
295  
296  
297  
298  
299  
300  
301  
302  
303  
304  
305  
306  
307  
308  
309  
310  
311  
312  
313  
314  
315  
316  
317  
318  
319  
320  
321  
322  
323  
324  
325  
326  
327  
328  
329  
330  
331  
332  
333  
334  
335  
336  
337  
338  
339  
340  
341  
342  
343  
344  
345  
346  
347  
348  
349  
350  
351  
352  
353  
354  
355  
356  
357  
358  
359  
360  
361  
362  
363  
364  
365  
366  
367  
368  
369  
370  
371  
372  
373  
374  
375  
376  
377  
378  
379  
380  
381  
382  
383  
384  
385  
386  
387  
388  
389  
390  
391  
392  
393  
394  
395  
396  
397  
398  
399  
400  
401  
402  
403  
404  
405  
406  
407  
408  
409  
410  
411  
412  
413  
414  
415  
416  
417  
418  
419  
420  
421  
422  
423  
424  
425  
426  
427  
428  
429  
430  
431  
432  
433  
434  
435  
436  
437  
438  
439  
440  
441  
442  
443  
444  
445  
446  
447  
448  
449  
450  
451  
452  
453  
454  
455  
456  
457  
458  
459  
460  
461  
462  
463  
464  
465  
466  
467  
468  
469  
470  
471  
472  
473  
474  
475  
476  
477  
478  
479  
480  
481  
482  
483  
484  
485  
486  
487  
488  
489  
490  
491  
492  
493  
494  
495  
496  
497  
498  
499  
500  
501  
502  
503  
504  
505  
506  
507  
508  
509  
510  
511  
512  
513  
514  
515  
516  
517  
518  
519  
520  
521  
522  
523  
524  
525  
526  
527  
528  
529  
530  
531  
532  
533  
534  
535  
536  
537  
538  
539  
540  
541  
542  
543  
544  
545  
546  
547  
548  
549  
550  
551  
552  
553  
554  
555  
556  
557  
558  
559  
560  
561  
562  
563  
564  
565  
566  
567  
568  
569  
570  
571  
572  
573  
574  
575  
576  
577  
578  
579  
580  
581  
582  
583  
584  
585  
586  
587  
588  
589  
590  
591  
592  
593  
594  
595  
596  
597  
598  
599  
600  
601  
602  
603  
604  
605  
606  
607  
608  
609  
610  
611  
612  
613  
614  
615  
616  
617  
618  
619  
620  
621  
622  
623  
624  
625  
626  
627  
628  
629  
630  
631  
632  
633  
634  
635  
636  
637  
638  
639  
640  
641  
642  
643  
644  
645  
646  
647  
648  
649  
650  
651  
652  
653  
654  
655  
656  
657  
658  
659  
660  
661  
662  
663  
664  
665  
666  
667  
668  
669  
670  
671  
672  
673  
674  
675  
676  
677  
678  
679  
680  
681  
682  
683  
684  
685  
686  
687  
688  
689  
690  
691  
692  
693  
694  
695  
696  
697  
698  
699  
700  
701  
702  
703  
704  
705  
706  
707  
708  
709  
710  
711  
712  
713  
714  
715  
716  
717  
718  
719  
720  
721  
722  
723  
724  
725  
726  
727  
728  
729  
730  
731  
732  
733  
734  
735  
736  
737  
738  
739  
740  
741  
742  
743  
744  
745  
746  
747  
748  
749  
750  
751  
752  
753  
754  
755  
756  
757  
758  
759  
760  
761  
762  
763  
764  
765  
766  
767  
768  
769  
770  
771  
772  
773  
774  
775  
776  
777  
778  
779  
780  
781  
782  
783  
784  
785  
786  
787  
788  
789  
790  
791  
792  
793  
794  
795  
796  
797  
798  
799  
800  
801  
802  
803  
804  
805  
806  
807  
808  
809  
810  
811  
812  
813  
814  
815  
816  
817  
818  
819  
820  
821  
822  
823  
824  
825  
826  
827  
828  
829  
830  
831  
832  
833  
834  
835  
836  
837  
838  
839  
840  
841  
842  
843  
844  
845  
846  
847  
848  
849  
850  
851  
852  
853  
854  
855  
856  
857  
858  
859  
860  
861  
862  
863  
864  
865  
866  
867  
868  
869  
870  
871  
872  
873  
874  
875  
876  
877  
878  
879  
880  
881  
882  
883  
884  
885  
886  
887  
888  
889  
890  
891  
892  
893  
894  
895  
896  
897  
898  
899  
900  
901  
902  
903  
904  
905  
906  
907  
908  
909  
910  
911  
912  
913  
914  
915  
916  
917  
918  
919  
920  
921  
922  
923  
924  
925  
926  
927  
928  
929  
930  
931  
932  
933  
934  
935  
936  
937  
938  
939  
940  
941  
942  
943  
944  
945  
946  
947  
948  
949  
950  
951  
952  
953  
954  
955  
956  
957  
958  
959  
960  
961  
962  
963  
964  
965  
966  
967  
968  
969  
970  
971  
972  
973  
974  
975  
976  
977  
978  
979  
980  
981  
982  
983  
984  
985  
986  
987  
988  
989  
990  
991  
992  
993  
994  
995  
996  
997  
998  
999  
1000

1  
2  
3 and details about the discharge. This information was updated during the stay and after  
4  
5 discharge by the study nurses/physicians through double-checking of the hospitals' patient  
6  
7 records and the electronic/written charts. Date of death was recorded retrospectively based on  
8  
9 automatic updates in the hospital records from the Cause of Death Registry[18].  
10

### 11 12 13 14 Symptom assessment

15  
16 The Edmonton Symptom Assessment System (ESAS) is one of the most frequently used  
17  
18 symptom assessment tools in palliative cancer care[19], and was developed to monitor the  
19  
20 most common cancer symptoms with minimal patient burden[20]. A Norwegian version of  
21  
22 the ESAS was used. The 0-10 numerical rating scale, ranging from 0 (0=*no symptom,*  
23  
24 *normal/good,* 10=*worst possible symptom*) was used for the following symptoms; *Pain at*  
25  
26 *rest, pain at movement, tiredness, nausea, shortness of breath, dry mouth (xerostomia),*  
27  
28 *appetite, anxiety/uneasiness, depression/sadness* and the question “ *Overall, how are you*  
29  
30 *feeling today?*” (*well-being*). Patients were asked to rate their symptoms at the present time.  
31  
32  
33  
34  
35

### 36 Structured patient interview

37  
38 A short structured interview (nine questions) was developed in order to assess the patients'  
39  
40 perceptions about the emergency admission. First, patients were asked to give the two most  
41  
42 important reasons for the emergency admission from a list of 16 frequent symptoms/problem  
43  
44 areas, supplemented by one open category. They were also asked about the duration of  
45  
46 symptom development, how the admission was organized, who they contacted to get help,  
47  
48 who organized the admission, and how they were transported to the hospital. Four questions  
49  
50 were assessing if the admission was in accordance with their desires, if they would have  
51  
52 preferred to receive treatment somewhere else, and if so where; at home, in another hospital,  
53  
54 in a nursing home or palliative care unit, and finally if they could identify certain  
55  
56  
57  
58  
59  
60

1  
2  
3 interventions that could have prevented the emergency admission; among others extended  
4 nursing home care, specialized palliative care teams, regular visits from the family doctor.  
5  
6 Free comments were encouraged.  
7  
8  
9

#### 10 11 Methods for data collection

12  
13 Patients were approached shortly after admission, and informed about the study by the study  
14 nurses. If the patient consented to participate, ESAS was administered at the earliest  
15 convenience. The second ESAS was completed as close to discharge as practically possible.  
16  
17 The structured interviews were undertaken 1-3 days after admission. These were performed  
18  
19 by two designated specialist nurses in palliative medicine.  
20  
21  
22  
23  
24  
25  
26

#### 27 **Ethical Considerations**

28  
29 The protocol was approved by the Regional Committee for Medical and Health Research  
30 Ethics, the Norwegian Social Science Data Services (NSD), the institutional review boards at  
31 the two hospitals and was conducted according to the rules of the Helsinki declaration. All  
32 participants provided written informed consent prior to study start.  
33  
34  
35  
36  
37  
38  
39

#### 40 **Statistics**

41  
42 Sample size estimations and power calculations were not performed due to the descriptive  
43 nature of the study. Standard descriptive statistics were used and few sub-group comparisons  
44 were performed due to the small sample size. Each admission and its related interventions  
45 were regarded as independent events. A p-value  $\leq 0.05$  was considered statistically significant.  
46  
47  
48 The PASW 18 statistical package was used (SPSS Inc., Chicago, IL, USA).  
49  
50  
51  
52  
53  
54  
55  
56  
57  
58  
59  
60

## RESULTS

### Patients

A total of 44 patients (27 males, 17 females) were included, accounting for 50 emergency admissions. Median age was 66 years (53-89) and 16 (36%) of the patients were  $\geq 70$  years. Forty patients (91%) had metastatic disease. The remaining four had lung (n=2) and gastrointestinal cancer (n=2) and were receiving palliative cancer care, due to their complex symptom burden.

One patient was still alive at the time of data analyses. Median survival for the remaining 43 patients was 50 days (range 1-500, 95% CI: 51-115) from the first day of study entry, Table 1. Five patients died while hospitalized, while median survival for the 38 patients who were discharged was 56 days (range 16-500, 95% CI: 58-128). Nine of these died within the first month. Sixteen patients lived for more than 90 days after discharge, six beyond 180 days, while two patients lived longer than the estimated life expectancy of 1 year.

**Table 1. Socio-demographic and medical characteristics<sup>1</sup>**

|                         |                         | N  | (%)  |
|-------------------------|-------------------------|----|------|
| <b>Sex</b>              | Male                    | 27 | (61) |
|                         | Female                  | 17 | (39) |
| <b>Marital status</b>   | Married/cohabiting      | 32 | (73) |
|                         | Single/widowed/divorced | 11 | (44) |
|                         | Missing                 | 1  | (2)  |
| <b>Living situation</b> | With others             | 32 | (73) |
|                         | Alone                   | 12 | (27) |

|                                                              |                                                             |               |                                |
|--------------------------------------------------------------|-------------------------------------------------------------|---------------|--------------------------------|
| <b>Education</b>                                             | Compulsory or less                                          | 17            | (39)                           |
|                                                              | High school graduate                                        | 15            | (34)                           |
|                                                              | College / university                                        | 11            | (25)                           |
|                                                              | Missing                                                     | 1             | (2)                            |
| <b>Diagnoses</b>                                             | Gastrointestinal                                            | 18            | (41)                           |
|                                                              | Lung                                                        | 11            | (25)                           |
|                                                              | Urological                                                  | 7             | (16)                           |
|                                                              | Other <sup>2</sup>                                          | 8             | (18)                           |
| <b>Metastatic disease</b> <sup>3</sup>                       | Presence of metastases                                      | 40            | (91)                           |
| <b>Site of metastases</b>                                    | Liver                                                       | 21            | (48)                           |
|                                                              | Lymph nodes                                                 | 17            | (39)                           |
|                                                              | Bone                                                        | 13            | (30)                           |
|                                                              | Lung                                                        | 12            | (27)                           |
|                                                              | Brain                                                       | 7             | (16)                           |
| <b>Tumour-directed treatment,<br/>Ongoing upon admission</b> | Chemotherapy                                                | 14            | (32)                           |
|                                                              | Hormones                                                    | <b>3</b>      | <b>(6)</b>                     |
|                                                              |                                                             | <b>Median</b> | <b>(range)</b>                 |
| <b>Age</b>                                                   |                                                             | 66            | (53-89)                        |
| <b>Survival</b>                                              | Overall survival <sup>4</sup> , days from first study entry | 50            | (1-500,<br>95% CI: 51-<br>115) |

<sup>1</sup> N = 44, the number of individual patients accounting for the 50 emergency admissions

<sup>2</sup> Breast (3), malignant melanoma (2), gynaecological (2), unspecified (1)

<sup>3</sup> Percentages exceed 100, because due to multiple sites per patients

<sup>4</sup> N=43, one patient was still alive at follow-up

### The emergency admissions

Information about reason for the emergency admission, was captured from the registrations in the medical charts by the attending doctors in the emergency department. In the majority of the cases (n=36, 72%) two reasons were listed, while a single symptom/condition was given in 14 of the admissions (28%); 86 indications in total. Overall, the most frequent indications were gastro-intestinal problems such as nausea/vomiting, diarrhoea and obstipation (n=22/86, 26%), lung problems such as dyspnoea, pleural effusion, pneumonia, embolism (n=17/86, 20%), pain (n=13/86, 15%), and reduced performance status (n=8/86, 9%).

### Figure 1. Most frequent reasons for the emergency admissions (file uploaded separately)

50% (n=25) of the emergency admissions were administered by a hospital doctor, and 24% (n=12) by the patient's general practitioner (GP) or a GP on call. In 45 cases (90%), patients were admitted from home, four patients came from the hospitals' out-patient clinic, and one from a nursing home. Forty-eight per cent (n=24) were transported by ambulance. In seven cases, an "open return" was established as part of the patient's care plan. However, only two patients were admitted directly to the appropriate hospital unit upon admission, while the remaining had to wait in the emergency room for up to seven hours. Twenty-three patients (46%) had been discharged from hospital less than one month prior to the actual admission

The highest number of emergencies, 18 of 50, occurred on Mondays. Overall, 19 (38%) of the admissions took place outside regular working hours, defined as 8 p.m. to 5 a.m. on weekdays. Fourteen of these (74%) occurred from Friday night through Sunday.

1  
2  
3 Median length of stay was seven days (1-35). Most discharges; 28/45 (62%), were to the  
4 patient's home, eight (18%) discharges were to a nursing home, five (11%) were transferred  
5 to another hospital or a specialized palliative care unit.  
6  
7  
8

### 9 10 11 **Examinations and interventions**

12  
13 X-ray, CT-scans, ultra-sound examinations and MRIs were performed in 66 (n=33), 48  
14 (n=24), 24% (n=12) and 8% (n=4) of the cases respectively. Six patients had none of these  
15 procedures done, three patients went through three of these, while one patient had all four  
16 done, prior to abdominal surgery. Seven patients had an electrocardiogram taken during their  
17 stay. Four patients went through surgical procedures; abdominal surgery (n=1), and insertion  
18 of stents (n=2) and a central venous catheter (n=1). None of the patients went directly to the  
19 intensive care unit (ICU) upon admission. One patient however, experienced severe  
20 complications related to dialysis during hospitalization, was admitted to the ICU after two  
21 days and subsequently died.  
22  
23  
24  
25  
26  
27  
28  
29  
30  
31  
32  
33  
34  
35

36 Several standard procedures were performed during hospitalization, with hydration (n=39,  
37 78%), antibiotics (n=21, 42%), and oxygen therapy (n=15, 30%) as the most frequent, Figure  
38 1. Maximum of registered procedures per patient was twelve, while the minimum was three.  
39 About one-third of the patients (n=15) were seen by an oncologist, while more than 50%  
40 (n=26) were approached by the hospital palliative team.  
41  
42  
43  
44  
45  
46  
47  
48  
49

### 50 **Figure 2. Most frequent interventions during hospitalization (file uploaded separately)**

51  
52  
53 Pain was prominent, and pain-related procedures were performed in all but seven cases. The  
54 main reasons for admission in these seven cases were dyspnoea (n=3), reduced performance  
55  
56  
57  
58  
59  
60

status (n=2), and problems swallowing (n=2). Two-thirds used strong analgesics such as morphine, fentanyl, or oxycodone upon admission, mostly as slow release tablets or patches.

The most frequent pain related interventions were changes in the analgesic regimen (n=24) such as opioid switch, adding a co-analgesic or increasing the dosage. Two patients had an epidural catheter inserted; one of these also had a coeliac blockage, and a spinal catheter.

### Symptom assessment, ESAS scores

Both ESAS forms were completed in 76% of the cases. Missing forms were due to death (n=5), discharge earlier than planned and administrative failure (n=7).

Median number of days from admission to the first ESAS was 1 (0-3), with a median of 5 days between assessments (1-20). ESAS no. 2 was completed shortly before discharge; same day (48%) or the day before (12%).

Table 2 displays the ESAS mean scores at inclusion and discharge. Pain at rest and pain at movement was significantly reduced during the stay, with a reduction of 1.7 for both between assessments (p-values <0.01). Highest mean intensity scores at inclusion were found with tiredness (6.1), appetite (5.6) and oral dryness/xerostomia (5.1). Upon discharge, six patients reported a score above three for pain at rest, while 11 patients had a pain score exceeding three for pain at movement.

**Table 2. ESAS scores at inclusion and prior to discharge<sup>1</sup>**

|                | 1 <sup>st</sup><br>assessment <sup>2</sup> | 2 <sup>nd</sup><br>assessment <sup>2</sup> | Difference in<br>mean scores<br>1 <sup>st</sup> and 2 <sup>nd</sup> ESAS | p-<br>value |
|----------------|--------------------------------------------|--------------------------------------------|--------------------------------------------------------------------------|-------------|
| <b>Symptom</b> | <b>Mean (SD)</b>                           | <b>Mean (SD)</b>                           |                                                                          |             |
| Pain at rest   | 3.2 (2.8)                                  | 1.5 (1.9)                                  | 1.7                                                                      | <.01        |



|                                       |           |           |      |      |
|---------------------------------------|-----------|-----------|------|------|
| Pain at movement                      | 4.4 (3.1) | 2.7 (2.7) | 1.7  | <.01 |
| Tiredness                             | 6.1 (2.5) | 5.5 (2.6) | 0.6  | NS   |
| Nausea                                | 1.7 (2.5) | 1.3 (2.0) | 0.4  | NS   |
| Shortness of breath                   | 3.0 (2.9) | 2.8 (3.2) | 0.2  | NS   |
| Oral dryness (xerostomia)             | 5.1 (2.7) | 5.2 (2.6) | -0.1 | NS   |
| Appetite                              | 5.6 (2.9) | 5.0 (2.4) | 0.6  | NS   |
| Anxiety/uneasiness                    | 1.9 (2.5) | 2.3 (2.7) | -0.4 | NS   |
| Depression/sadness                    | 2.3 (2.7) | 2.9 (3.0) | -0.6 | NS   |
| “Overall, how are you feeling today?” | 4.5 (2.3) | 4.2 (2.1) | 0.3  | NS   |

<sup>1</sup> Numerical rating scale (0-10) with higher scores implying higher symptom intensity

<sup>2</sup> N varies between 38 and 34, due to missing items on some of the forms

Mean ESAS scores at inclusion in the 12 cases in which the second form was not completed were compared with scores from those who completed both. No significant differences were found.

### The patient interviews

Patients were asked to mention the two most bothersome symptoms leading to the hospitalization. Gastrointestinal symptoms including nausea/vomiting, diarrhoea and appetite loss (n=24, 48%), fatigue (n=19, 38%), pain (n=18, 38%), and dyspnoea (n=10, 20%) were the most frequent reasons according to the patients. In most cases (n=32, 64%), patients said the symptoms had developed over several days, and this was reported by all of the 18 patients who were admitted on a Monday. Six patients (12%) reported a more acute onset with symptoms developing during a few hours. Four of these patients came to the hospital outside normal working hours. Nineteen patients (38%) received regular medical care at home from the community health system, such as nursing services and domestic assistance, or both.

1  
2  
3 When asked about preference for care the majority of patients (n=33, 66%) preferred hospital  
4 admission to other places in the actual situation. Nine (18%) said they would have liked to  
5 receive medical treatment at home, given that necessary resources and equipment were  
6 available, while four (8%) would have preferred a nursing home.  
7  
8  
9  
10

11  
12  
13  
14 Free comments were provided in 44 interviews. Seven patients (16%) perceived the delays in  
15 the emergency unit as tiring and unnecessary, while another seven (16%) found this  
16 acceptable. Two patients (5%) specifically stated that they would have preferred direct  
17 admission to the appropriate hospital unit, while another two (5%) had a desire to go directly  
18 to the palliative care unit. In ten interviews (23%), patients said they felt safer at hospital than  
19 at home given the actual situation. Seven of these (70%) were 65 years or older, but only one  
20 was living alone. Four (10%) expressed concerns about the caregiver burden imposed on their  
21 partner. The most frequently raised comment in the interviews (n=11, 25%) was related to  
22 doubts whether the home care services had competence and expertise to handle the situation.  
23  
24 Nevertheless, ten patients (23%) said they would have preferred to get simple procedures such  
25 as intravenous nutrition and hydration at home. In their opinion, specialized care teams and  
26 home visits by their GP were the most important actions to prevent emergency admissions.  
27  
28  
29  
30  
31  
32  
33  
34  
35  
36  
37  
38  
39  
40  
41  
42

## 43 **DISCUSSION**

44  
45  
46 This small, descriptive study from two acute-care Norwegian hospitals serving local, urban  
47 areas shows that relatively simple procedures were performed in most of the emergency cases.  
48  
49 Standard interventions such as hydration, antibiotics, and oxygen therapy were most common,  
50 corresponding well with the most frequent reasons for admission. In many cases, these  
51 procedures may well be administered in the primary health care sector.  
52  
53  
54  
55  
56  
57  
58  
59  
60

1  
2  
3 Pain, gastro-intestinal and respiratory problems were prominent, well in line with other  
4 studies of emergency admissions[4,5,21,22]. These are frequent symptoms in advanced  
5 cancer patients, and may indicate disease progression. One study demonstrated a significant  
6 relationship between signs of disease progression and short term mortality (<90 and <180  
7 days) in symptomatic cancer patients coming to the ER[22], in line with other reports[23,24].  
8 Although the present study was too small to perform valid analyses of a possible relationship  
9 between symptoms and survival, our sample consisted of cancer patients in the palliative  
10 phase of disease, and more than 50% were dead 90 days after discharge. This suggests that  
11 standard medical procedures were indicated for most of the patients, and more advanced  
12 procedures in some cases only.  
13  
14  
15  
16  
17  
18  
19  
20  
21  
22  
23  
24  
25  
26

27 Thirty-eight per cent of the admissions were outside normal working hours, a lower  
28 proportion than reported elsewhere[21]. In most cases, patients said that symptoms had  
29 developed over time. Monday had the highest percentage of emergency admissions as found  
30 by others[21], which corresponds to a gradual onset of symptoms, as reported by all of the  
31 patients admitted on Mondays. It may also be that patients tried to avoid going in on  
32 weekends and waited until Monday before contacting the hospital or the GP.  
33  
34  
35  
36  
37  
38  
39  
40  
41  
42

43 Many common symptoms are bothersome and distressing and known to cause considerable  
44 anxiety in patients, and in relatives. Thus, it should be remembered that causes other than  
45 strict medical, somatic indications may lead to hospital admissions, e.g. reduced performance  
46 status, frailty, loneliness and psychological distress that often coexist. Some patients  
47 commented that they felt safer at hospital than at home, and that they wanted to reduce the  
48 burden imposed on their family by the disease. Causes like this may be more common in  
49 smaller hospitals serving a well-defined area compared to larger university clinics. In our  
50  
51  
52  
53  
54  
55  
56  
57  
58  
59  
60

1  
2  
3 opinion, maybe the most important issue raised by this study is not whether hospital  
4 admission was indicated per se, but if hospital admission as an emergency case was most  
5 appropriate for getting necessary medical care. We also believe however, that a higher level  
6 of specialist palliative care competence in the home care services and closer collaboration  
7 between these services and the hospital may reduce the need for emergency admissions.  
8  
9  
10  
11  
12

13  
14  
15  
16 This also relates to the fact that about 50% of the admissions were administered by a hospital  
17 doctor, twice as many as by GPs (24%). The standard pathway for hospital admissions in  
18 Norway is through the family GP, unless there is an emergency. The fact that our sample  
19 consisted of palliative care patients with an affiliation to the local hospital, may explain why  
20 the hospital doctors were so frequently contacted. It is noteworthy however, that a home visit  
21 by a medical doctor was mentioned as the most wanted intervention that could possibly have  
22 prevented the emergency admission. Shorter hospital stays and more people living longer at  
23 home with advanced disease, represent a challenge for the primary health care sector,  
24 specifically so for the GPs[25,26] as they are crucial in the follow-up and care for patients  
25 with advanced cancer outside hospital[27]. One study found that a higher number of visits to  
26 the family doctor was inversely associated with the number of visits to the ER in patients  
27 dying from cancer[28].  
28  
29  
30  
31  
32  
33  
34  
35  
36  
37  
38  
39  
40  
41  
42  
43  
44

45 In our opinion, this points to two important aspects related to palliative care; namely that it is  
46 misconstrued as end-of-life care only[11], and that it should be integrated into standard  
47 oncology upon the diagnosis of metastatic or advanced cancer. WHO emphasize that  
48 palliative care is applicable early in the course of illness[29] due to systematic approach to  
49 symptom relief, enhanced quality of life of patient and caregivers, less use of emergency care  
50  
51  
52  
53  
54  
55  
56  
57  
58  
59  
60

1  
2  
3 services and a timelier referral to specialized palliative care, that often takes place too  
4  
5 late[12,21,30].  
6  
7

8  
9  
10 The fact that many patients with advanced cancer see acute-care providers, makes systematic  
11  
12 follow-up less common, and means that collaborative care plans across organizational levels  
13  
14 are not available, even if needed. Home care of patients with advanced cancer should be taken  
15  
16 care of by specialist teams with easy access to hospital based palliative care specialists, in  
17  
18 close collaboration with the family doctor. Pain related interventions were performed in  
19  
20 almost all patients, and there was a significant decline in the mean pain scores (mean 1.7) on  
21  
22 the ESAS from admission to discharge. A recent study in more than 200 patients showed that  
23  
24 a decrease of 1.2 units in the ESAS pain score constituted a clinically relevant  
25  
26 improvement[31]. A change in the analgesic regimen was the most frequent procedure, and it  
27  
28 is reason to believe that this and other simple procedures could have been performed at home,  
29  
30 if the resources in the form of necessary competence were available. This may reduce the  
31  
32 dependency on the local hospital and reduce the number of emergency admissions.  
33  
34  
35  
36  
37

38  
39 One limitation is the lack of information about performance status and current disease status  
40  
41 at admission, both important predictors of survival and disease progression[22]. This might  
42  
43 have provided more valid information about the necessity of being admitted as an emergency  
44  
45 case. The majority of patients had metastatic disease and few received tumour-directed  
46  
47 treatment upon admission, indicating that the majority were in the late stages of disease.  
48  
49 Additionally, lung symptoms, reported as an independent predictor of death within 90 and 180  
50  
51 days[22-24] were among the most frequent reasons for admission. Although some patients  
52  
53 needed more advanced procedures (surgery, CTscans, MRIs), relatively simple procedures  
54  
55 like hydration, antibiotics and change in analgesics were most common. This may be taken to  
56  
57  
58  
59  
60

1  
2  
3 indicate that an emergency hospital admission was necessary for some patients, but not for all.  
4  
5 To perform a valid investigation of the “true” proportion of patients needing emergency  
6  
7 admissions, a larger study with thorough objective examinations, and detailed registrations of  
8  
9 all interventions and a close follow-up is necessary, which was beyond the scope of this  
10  
11 descriptive study. This is also related to the limitation caused by the small sample size, and  
12  
13 the fact that the study was confined to two hospitals only. The first does not allow for  
14  
15 advanced statistics and sub-group comparisons, while the second may limit the  
16  
17 generalizability. On the other hand, there are many relatively small acute care hospitals in  
18  
19 Norway, serving a limited catchment area with a well-organized primary health care sector. It  
20  
21 could be argued that more knowledge about the extent and quality of the home care nursing  
22  
23 services, and the amount of patients’ contact with the GP would have provided important  
24  
25 information about the need for an emergency admission. This is true, but we also believe that  
26  
27 a small study like this makes the findings relevant to consider in discharge planning and  
28  
29 palliative care follow-up, as was our intention with the present study. Also, the fact that all  
30  
31 consecutive emergency cases in the actual time period were considered for inclusion is a  
32  
33 major strength, in our opinion. Furthermore, quantitative registrations combined with  
34  
35 interviews give a better picture of the patients’ experiences, than registry-based studies alone.  
36  
37  
38  
39  
40  
41  
42

43 The fact that close to 50% of our patients had been discharged from hospital less than one  
44  
45 month prior to the actual admission emphasizes the need to improve the continuity of care,  
46  
47 through a systematic follow-up and treatment plan, which are cornerstones of palliative care.  
48  
49 This may actually have a double effect, preventing a rapid development in symptom intensity  
50  
51 and improving the feeling of safety for patients and family, thereby reducing the need for  
52  
53 emergency admissions.  
54  
55  
56  
57  
58  
59  
60

## CONCLUSION

Emergency admissions may represent stressful events for patients and relatives. This study showed that many patients needed simple procedures only. About two-thirds preferred hospital admission to other places of care, and about one-fourth expressed that they felt safe in the hospital in the actual situation. Higher levels of expertise, easier access to medical doctors outside hospital and better lines of cooperation between hospitals and the primary health care services may reduce need for emergency admissions.

## ACKNOWLEDGEMENTS

This project was supported in part by a grant from the Department of Research at Østfold Hospital Trust, Norway. The authors want to thank Marit S. Jordhøy, Norway, who gave valuable advice in the protocol and manuscript writing, and Irmelin Bergh who helped out in the initial phase of the study planning. Special thanks are also given to the study coordinators at the participating centres and the patients who took part in the study.

## FUNDING

Small grant, the Department of Research at Ostfold Hospital Trust, Norway

## COMPETING INTERESTS

None

## CONTRIBUTORSHIP

Hjermstad: protocol writing, ethics applications, development of forms, study conduct, data analyses, manuscript writing

Kolflaath: original idea, protocol writing, manuscript writing

Løkken: data collection, protocol writing, manuscript writing

Hanssen: data collection, protocol writing, manuscript writing

Normann: protocol writing, manuscript writing

Aass: protocol writing, ethics applications, study conduct, data analyses, manuscript writing

## DATA SHARING

No further data is going to be published from this study

## REFERENCES

1. Kreftegristeret, Cancer Registry of Norway. Homepage: <http://www.kreftegristeret.no/en/>. (2011, Accessed Nov 2012)
2. Verdecchia A, Francisci S, Brenner H, et al. Recent cancer survival in Europe: a 2000-02 period analysis of EURO-CARE-4 data. *Lancet Oncol* 2007;**9**:784-796.
3. Earle CC, Park ER, Lai B, et al. Identifying potential indicators of the quality of end-of-life cancer care from administrative data. *J Clin Oncol* 2003;**21**:1133-1138.
4. Yates M, Barrett A. Oncological emergency admissions to the Norfolk and Norwich University Hospital: an audit of current arrangements and patient satisfaction. *Clin Oncol (R Coll Radiol)* 2009;**3**:226-233.
5. Barbera L, Taylor C, Dudgeon D. Why do patients with cancer visit the emergency department near the end of life? *CAMJ* 2010;**182**(6):563-568
6. Earle CC, Neville BA, Landrum MB, et al. Trends in the aggressiveness of cancer care near the end of life. *J Clin Oncol* 2004;**2**:315-321
7. Huang J, Boyd C, Tyldesley S, et al. Time spent in hospital in the last six months of life in patients who died of cancer in Ontario. *J Clin Oncol* 2002;**6**:1584-1592.
8. Barbera L, Paszat L, and Chartier C. Indicators of poor quality end-of-life cancer care in Ontario. *J Palliat Care* 2006;**1**:12-17.
9. Ho TH, Barbera L, Saskin R, et al. Trends in the aggressiveness of end-of-life cancer care in the universal health care system of Ontario, Canada. *J Clin Oncol* 2011; **12**: 1587-1591.
10. Earle CC, Landrum MB, Souza JM, et al. Aggressiveness of cancer care near the end of life: is it a quality-of-care issue? *J Clin Oncol* 2008; **23**: 3860-3866.
11. Smith TJ, Temin S, Alesi ER, et al. American society of clinical oncology provisional clinical opinion: the integration of palliative care into standard oncology care. *J Clin Oncol* 2012;**8**:880-887.
12. Bruera E, and Hui D. Integrating supportive and palliative care in the trajectory of cancer: establishing goals and models of care. *J Clin Oncol* 2010; **25**: 4013-4017.
13. Dudgeon DJ, Knott C, Eichholz M, et al. Palliative Care Integration Project (PCIP) quality improvement strategy evaluation. *J Pain Symptom Manage* 2008;**6**:573-582.
14. Higginson IJ, and Evans CJ. What is the evidence that palliative care teams improve outcomes for cancer patients and their families? *Cancer J* 2010;**5**:423-435.
15. Brumley R, Enguidanos S, Jamison P, et al. Increased satisfaction with care and lower costs: results of a randomized trial of in-home palliative care. *J Am Geriatr Soc* 2007;**7**:993-1000.



16. Bakitas M, Lyons KD, Hegel MT, et al. Effects of a palliative care intervention on clinical outcomes in patients with advanced cancer: the Project ENABLE II randomized controlled trial. *JAMA* 2009;7:741-749.
17. International Classification of Diseases ICD-10. Home page: <http://www.who.int/classifications/icd/en/>, (2010, Accessed Nov 2012).
18. Norwegian Cause of Death Registry. Home page: [http://www.ssb.no/english/subjects/03/01/10/dodsarsak\\_en/](http://www.ssb.no/english/subjects/03/01/10/dodsarsak_en/). (2010, Accessed Nov 2012).
19. Nekolaichuk C, Watanabe S, and Beaumont C. The Edmonton Symptom Assessment System: a 15-year retrospective review of validation studies (1991-2006). *Palliat Med* 2008;2:111-122.
20. Bruera E, Kuehn N, Miller MJ, et al. The Edmonton Symptom Assessment System (ESAS): a simple method for the assessment of palliative care patients. *J Palliat Care* 1991;2:6-9.
21. Mayer DK, Travers D, Wyss A, et al. Why do patients with cancer visit emergency departments? Results of a 2008 population study in North Carolina. *J Clin Oncol* 2011;19:2683-2688.
22. Geraci JM, Tsang W, Valdres RV, et al. Progressive disease in patients with cancer presenting to an emergency room with acute symptoms predicts short-term mortality. *Support Care Cancer* 2006;10:1038-1045.
23. Escalante CP, Martin CG, Elting LS, et al. Identifying risk factors for imminent death in cancer patients with acute dyspnea. *J Pain Symptom Manage* 2000;5:318-325.
24. Vigano A, Dorgan M, Bruera E, et al. The relative accuracy of the clinical estimation of the duration of life for patients with end of life cancer. *Cancer* 1999;1:170-176.
25. Menten J, and de Lepeleire J. Emergency hospital admission for pain in palliative patients: a crucial role for general practitioners. *Eur J Gen Pract* 2006;3:133-134.
26. Wiese CH, Bartels UE, Ruppert D, et al. Treatment of palliative care emergencies by prehospital emergency physicians in Germany: an interview based investigation. *Palliat Med* 2009;4:369-373.
27. Wiese CH, Bartels UE, Marczyńska K, et al. Quality of out-of-hospital palliative emergency care depends on the expertise of the emergency medical team--a prospective multi-centre analysis. *Support Care Cancer* 2009; 12: 1499-1506.
28. Burge F, Lawson B, and Johnston G. Family physician continuity of care and emergency department use in end-of-life cancer care. *Med Care* 2003;41:992-1001.
29. World Health Organization. Homepage <http://www.who.int/cancer/palliative/definition/en/>. (2011, accessed Nov 2012).
30. Daugherty CK, and Steensma DP. Overcoming obstacles to hospice care: an ethical examination of inertia and inaction. *J Clin Oncol* 2003;21(9 Suppl):42s-45s.

- 1  
2  
3 31. Bedard G, Zeng L, Zhang L, et al. Minimal Clinically Important Differences in the  
4 Edmonton Symptom Assessment System in Patients With Advanced Cancer. *J Pain*  
5 *Symptom Manage* 2012. Epub ahead of print, Nov 21, doi:  
6 10.1016/j.jpainsymman.2012.07.022.  
7  
8  
9  
10  
11  
12  
13  
14  
15  
16  
17  
18  
19  
20  
21  
22  
23  
24  
25  
26  
27  
28  
29  
30  
31  
32  
33  
34  
35  
36  
37  
38  
39  
40  
41  
42  
43  
44  
45  
46  
47  
48  
49  
50  
51  
52  
53  
54  
55  
56  
57  
58  
59  
60

For peer review only

1  
2  
3  
4  
5 **Are Emergency admissions in palliative cancer care ~~may are not~~ always be**  
6 **necessary? Results from a descriptive study.**  
7  
8  
9

10  
11 **Marianne Jensen Hjermstad<sup>a,b</sup>, Jan Kolflaath<sup>c</sup>, Aud O. Løkken<sup>c</sup>, Sjur B. Hanssen<sup>a</sup>, Are**  
12 **Normann<sup>d</sup>, Nina Aass<sup>a,e</sup>**  
13

14  
15  
16 <sup>a</sup> Regional Centre for Excellence in Palliative Care, Department of Oncology, Oslo University  
17 Hospital, Oslo, Norway

18 <sup>b</sup> European Palliative Care Research Centre, Department of Cancer Research and Molecular  
19 Medicine, Faculty of Medicine, Norwegian University of Science and Technology,  
20 Trondheim, Norway

21 <sup>c</sup> Department of Anaesthesiology, Østfold Hospital Trust, Fredrikstad, Norway

22 <sup>d</sup> Hospice Lovisenberg, Lovisenberg ~~Deaconal~~-Diakonale Hospital, Oslo, Norway

23 <sup>e</sup> Faculty of Medicine, University of Oslo, Oslo, Norway  
24  
25  
26  
27  
28  
29  
30  
31  
32  
33  
34  
35  
36

37 **Corresponding author**

38 Marianne Jensen Hjermstad

39 Regional Centre for Excellence in Palliative Care, Department of Oncology

40 Oslo University Hospital, Ullevål

41 BOX 4956, Nydalen, 0424 Oslo, Norway

42 E-mail: marianne.j.hjermstad@ntnu.no

43 Telephone number: +47 23 02 68 28, Fax number: +47 22 11 80 75  
44  
45  
46  
47  
48  
49  
50  
51

52 **WORDS:** 3634-3942 with all headings and headlines, 30-31 references, 1-2 figures, 2 tables  
53

54 **RUNNING HEAD:** Palliative care emergency admissions  
55

56  
57 **KEY WORDS:** Palliative care, emergency admissions, symptom management, cancer,  
58 continuity of care  
59  
60

## ABSTRACT

**Objectives.** Patients with advanced cancer are often admitted to hospital as emergency cases. This may not always be medically indicated. Study objectives were to register the reasons for the emergency ~~admittance~~admissions, to examine interventions performed during hospitalization and self-reported symptom intensity at admission and discharge, and to assess patients' opinions about the admission. **Design.** This was a descriptive, before-and-after study. Participating patients completed the Edmonton Symptom Assessment System (ESAS) twice; upon hospital admission and prior to discharge. All patients underwent a structured interview assessing their opinion about the emergency admission. Medical data was obtained from hospital records. **Setting.** The study was performed in two Norwegian acute care secondary hospitals with urban catchment areas. **Participants.** Forty-four cancer patients (M: 27/F: 17, mean age 69.~~7~~2, SD: 9.2) representing 50 emergency admissions were included. **Results.** Median length of stay was 7 days (95% CI; 7.4-11.4). Median survival was 50 days (95% CI; 51-115). Ninety per cent were admitted from home, and 46% had been hospitalized less than one month earlier. Lung and gastro-intestinal symptoms and pain were the most frequent reasons for ~~admittance~~admissions. Mean pain scores on the ESAS were reduced by 50% from admission to discharge ( $p < 0.01$ ). Simple interventions such as hydration, bladder catheterization and oxygen therapy were most frequent. Nearly one-third would have preferred treatment at another site, ~~given~~provided that the quality of care was similar. Home visits by the family doctor and specialized care teams were perceived by patients as important to prevent hospitalization. **Conclusion.** In most emergency admissions, relatively simple medical interventions are necessary. Specialized care teams with palliative care physicians, easier access to the family doctor and better lines of cooperation between hospitals and the primary care sector, may make it possible to perform more of these procedures at home, thereby reducing the need for emergency ~~hospitalization~~admissions.

## Article Summary

### Article focus

- Investigate the reasons for emergency admissions of palliative care cancer patients
- Register interventions performed in the hospital
- Examine symptom intensity before and after medical interventions by a standardized self-report tool (ESAS)

### Key messages

- Palliative care emergency admissions not always necessary, nor strictly medically indicated
- Simple medical procedures in the home care setting may reduce the need for emergency admissions
- Increased level of competence and more specialized palliative care skills in the primary health care sector is necessary to prevent hospitalization-emergency admissions

### Strengths and limitations of this study

#### Strengths

All potentially eligible patients were assessed

Registrations were done prospectively, with a thorough examination of charts after discharge / death, the latter that was also assessed retrospectively

Patients' own experiences were registered

#### Limitations

Small study in two hospitals only, with a limited number of variables, may reduce overall generalizability

No registration of ECOG/Karnofsky score upon admission

---

## INTRODUCTION

Thanks to modern, multimodal therapy, survival has improved for many cancer diagnoses.

Slightly less than 50% of the patients will die from their cancer[1] while the remaining half will live with the disease for shorter or longer periods of time[2]. This accentuates the need for optimal symptom management and maintenance of quality of life throughout the disease trajectory.

Admissions to the intensive care unit and number of visits to the emergency room (ER) are quality indicators in end of life care[3]. Although this may be necessary in many cases, it is

1  
2  
3 not always so. A British study examined emergency admissions of cancer patients in an acute  
4 care hospital and concluded that close to 50% neither needed nor wanted to be admitted as an  
5 emergency[4]. This is in line with a Canadian study examining administrative data on  
6 admissions, concluding that many visits to the emergency department by patients with cancer  
7 near the end of life may be avoidable[5].—Studies have documented that patients with  
8 incurable cancer frequently use acute care hospitals for acute problems and symptomatic  
9 treatment[5,6,7,8], particularly so older cancer patients during their last month of life[67]. A  
10 A study from Ontario published in 2006 [8]Canadian study showed that 27% of cancer  
11 patients had a visit to the ER in the last two weeks of life, corresponding to 34% in a  
12 subsequent report (2010)[75], in line with other reports demonstrating increasing trends over  
13 time[56,89,910].

14  
15  
16  
17  
18  
19  
20  
21  
22  
23  
24  
25  
26  
27  
28  
29  
30 A closer collaboration between oncology and palliative care has been  
31 recommended[1011,1112]. One study reported that systematic implementation of a palliative  
32 care integration project resulted in significantly better documentation of pain, fewer visits to  
33 the ER, and fewer admissions to acute care hospitals[1213]. This was consistent with a review  
34 showing that home, hospital, and inpatient specialist palliative care significantly improved  
35 symptom control, pain and anxiety, and reduced hospital admissions[1314]. Similar findings  
36 were reported from an RCT in a mixed sample of terminally ill patients who received  
37 specialized in-home palliative care[1415]. Another RCT, however, comparing a multi-  
38 component intervention and follow-up, found no reduction in ER visits but significantly better  
39 quality of life and mood[1516].

40  
41  
42  
43  
44  
45  
46  
47  
48  
49  
50  
51  
52  
53  
54  
55  
56  
57  
58  
59  
60  
Emergency admissions often represent stressful events for the patients and their families due  
to anxiety, feeling of discontinuity, and logistic problems in an emergency setting that may

1  
2  
3 increase the waiting time. Having to go to the emergency room for admission may also  
4  
5 conflict with patients' wishes. Based on our experience in palliative medicine, and our interest  
6  
7 in continuity of care in patients with advanced disease, we have conducted a small descriptive  
8  
9 study aiming to aid in the planning of palliative care in two Norwegian acute care local  
10  
11 hospitals. Study aims were to register the reasons for the emergency ~~admittances~~admissions,  
12  
13 to examine symptom intensity upon admission and discharge and to register the interventions  
14  
15 performed during hospitalization. Patients' opinions about the emergency admission were also  
16  
17 assessed.  
18  
19

## 20 21 22 23 **MATERIAL AND METHODS**

### 24 25 26 27 **Patients**

28  
29 The two hospitals were Østfold Hospital Trust (SØF) and Lovisenberg ~~Deaconal~~Diakonale  
30  
31 Hospital (LDS). SØF is the district general hospital for approximately 277,000 inhabitants in  
32  
33 the south-eastern part of Norway. The hospital has specialist health care services in most  
34  
35 medical specialities, including oncology and palliative care. LDS is located in the capital,  
36  
37 Oslo. It serves as the general hospital for psychiatry and internal medicine including  
38  
39 emergency admissions, in one of four city sectors with a catchment area of about 156,000  
40  
41 inhabitants. LDS has a specialized palliative care unit.  
42  
43

44  
45 The Norwegian health care system is organised with university, regional and local hospitals  
46  
47 and widespread community health care services. In the catchment areas of these two hospitals,  
48  
49 the home care services had nurses with special training in palliative care, supplemented by  
50  
51 experienced physicians who were available on request. Also, all palliative care patients who  
52  
53 have had previous contact with the hospitals receive special follow-up from the hospital  
54  
55 directly or through the hospitals' ambulant palliative care teams, as necessary. The update is  
56  
57  
58  
59  
60

1  
2  
3 normally adapted and updated according to changing needs. Nevertheless, unplanned hospital  
4 ~~admittance~~admissionss in Norway are normally routed through the emergency department,  
5  
6 even if the patients have a previous affiliation with the hospital. Formal advanced care  
7 planning is not routinely applied in Norway, but elements from such plans are often part of  
8 the discussion with patients and their relatives.  
9  
10  
11  
12  
13

14  
15  
16 A consecutive sample of cancer patients who were admitted through the emergency  
17 departments was included between October 2009 and May 2010. Inclusion criteria were a  
18 verified diagnosis of cancer in the palliative phase of disease, documented in the patient  
19 chart), anticipated survival less than 1 year and cognitive and physical capacity to complete  
20 the study as evaluated by the attending oncologist prior to inclusion, age  $\geq 18$  years, fluency in  
21 Norwegian and provision of signed informed consent. Exclusion criteria were treatment with  
22 curative or adjuvant intent, a psychiatric diagnosis and language problems/illiteracy.  
23  
24  
25  
26  
27  
28  
29  
30  
31  
32  
33

### 34 **Instruments**

35  
36 Medical and socio-demographic data

37  
38 The CRF encompassed socio-demographic variables (marital and living situation), use of  
39 home care etc.), and details about the admission (date, time, reason for and organization of the  
40 admission). One dichotomous question (Y/N) asked about the use of different home care  
41 services such as specialized palliative care, generalist home care teams, contact with  
42 community cancer nurse etc., as well as help from family/friends in the last three months.  
43  
44  
45  
46  
47  
48

49 Medical data e.g. cancer diagnosis (ICD-10) [4617], metastases, on-going or previous tumour  
50 directed treatment (chemotherapy, radiotherapy, biological agents, hormonal therapy), and  
51 recent hospital discharges were recorded, as were medical interventions during hospitalization  
52 and details about the discharge. This information was updated during the stay and after  
53  
54  
55  
56  
57  
58  
59  
60



1  
2  
3 discharge by the study nurses/physicians through double-checking of the hospitals' patient  
4 records and the electronic/written charts. Date of death was recorded retrospectively based on  
5 automatic updates in the hospital records from the Cause of Death Registry[1718].  
6  
7  
8  
9

### 10 Symptom assessment

11  
12 The Edmonton Symptom Assessment System (ESAS) is one of the most frequently used  
13 symptom assessment tools in palliative cancer care[1819], and was developed to monitor the  
14 most common cancer symptoms with minimal patient burden[1920]. A Norwegian version of  
15 the ESAS was used. The 0-10 numerical rating scale, ranging from 0 (0=*no symptom,*  
16 *normal/good, 10=*worst possible symptom*) was used for the following symptoms; *Pain at*  
17 *rest, pain at movement, tiredness, nausea, shortness of breath, dry mouth (xerostomia),*  
18 *appetite, anxiety/uneasiness, depression/sadness* and the question “ *Overall, how are you*  
19 *feeling today?*” (*well-being*). Patients were asked to rate their symptoms at the present time.  
20  
21  
22  
23  
24  
25  
26  
27  
28  
29  
30  
31  
32  
33*

### 34 Structured patient interview

35  
36 A short structured interview (nine questions) was developed in order to assess the patients'  
37 perceptions about the emergency ~~admittance~~admission. First, patients were asked to ~~choose~~  
38 ~~give~~ the two most important reasons for the emergency ~~admittance~~admission from a list of 16  
39 frequent symptoms/problem areas, supplemented by one open category. They were also asked  
40 about the duration of symptom development, how the ~~admittance~~admission was organized,  
41 who they contacted to get help, who organized the ~~admittance~~admission, and how they were  
42 transported to the hospital. Four questions were assessing if the admission was in accordance  
43 with their desires, if they would have preferred to receive treatment somewhere else, and if so  
44 where; at home, in another hospital, in a nursing home or palliative care unit, and finally if  
45 they could identify certain interventions that could have prevented the emergency admission;  
46  
47  
48  
49  
50  
51  
52  
53  
54  
55  
56  
57  
58  
59  
60

1  
2  
3 among others ~~more~~extended nursing home care, specialized palliative care teams, regular  
4  
5 visits from the family doctor. Free comments were encouraged.  
6  
7

#### 8 9 10 Methods for data collection

11 Patients were approached shortly after admission, and informed about the study by the study  
12 nurses. If the patient consented to participate, ESAS was administered at the earliest  
13 convenience. The second ESAS was completed as close to discharge as practically possible.  
14 The structured interviews were undertaken 1-3 days after admission. These were performed  
15 by two designated specialist nurses in palliative medicine.  
16  
17  
18  
19  
20  
21  
22  
23  
24

#### 25 **Ethical Considerations**

26  
27 The protocol was approved by the Regional Committee for Medical and Health Research  
28 Ethics, the Norwegian Social Science Data Services (NSD), the institutional review boards at  
29 the two hospitals and was conducted according to the rules of the Helsinki declaration. All  
30 participants provided written informed consent prior to study start.  
31  
32  
33  
34  
35  
36  
37  
38

#### 39 **Statistics**

40 Sample size estimations and power calculations were not performed due to the descriptive  
41 nature of the study. Standard descriptive statistics were used and few sub-group comparisons  
42 were performed due to the small sample size. Each admission and its related interventions  
43 were regarded as independent events. A p-value  $\leq 0.05$  was considered statistically significant.  
44  
45  
46  
47  
48  
49 The PASW 18 statistical package was used (SPSS Inc., Chicago, IL, USA).  
50  
51  
52  
53  
54  
55  
56  
57  
58  
59  
60

## RESULTS

### Patients

A total of 44 patients (27 males, 17 females) were included, accounting for 50 emergency admissions. Median age was 66 years (53-89) and 16 (36%) of the patients were  $\geq 70$  years.

Forty patients (91%) had metastatic disease. The remaining four had lung (n=2) and gastrointestinal cancer (n=2) and were receiving palliative cancer care, due to their complex symptom burden.

One patient was still alive at the time of data analyses. Median survival for the remaining 43 patients was 50 days (range 1-500, 95% CI: 51-115) from the first day of study entry, Table 1.

Five patients died while hospitalized, while median survival for the 38 patients who were discharged was 56 days (range 16-500, 95% CI: 58-128). Nine of these died within the first month. Sixteen patients lived for more than 90 days after discharge, six beyond 180 days, while two patients lived longer than the estimated life expectancy of 1 year.

**Table 1. Socio-demographic and medical characteristics<sup>1</sup>**

|                         |                         | N  | (%)  |
|-------------------------|-------------------------|----|------|
| <b>Sex</b>              | Male                    | 27 | (61) |
|                         | Female                  | 17 | (39) |
| <b>Marital status</b>   | Married/cohabiting      | 32 | (73) |
|                         | Single/widowed/divorced | 11 | (44) |
|                         | Missing                 | 1  | (2)  |
| <b>Living situation</b> | With others             | 32 | (73) |
|                         | Alone                   | 12 | (27) |

|                                               |                                                                                           |               |                                |
|-----------------------------------------------|-------------------------------------------------------------------------------------------|---------------|--------------------------------|
| <b>Education</b>                              | Compulsory or less                                                                        | 17            | (39)                           |
|                                               | High school graduate                                                                      | 15            | (34)                           |
|                                               | College / university                                                                      | 11            | (25)                           |
|                                               | Missing                                                                                   | 1             | (2)                            |
| <b>Diagnoses</b>                              | Gastrointestinal                                                                          | 18            | (41)                           |
|                                               | Lung                                                                                      | 11            | (25)                           |
|                                               | Urological                                                                                | 7             | (16)                           |
|                                               | Other <sup>2</sup>                                                                        | 8             | (18)                           |
| <b>Metastatic disease</b> <sup>3</sup>        | Presence of metastases                                                                    | 40            | (91)                           |
| <b>Site of metastases</b>                     | Liver                                                                                     | 21            | (48)                           |
|                                               | Lymph nodes                                                                               | 17            | (39)                           |
|                                               | Bone                                                                                      | 13            | (30)                           |
|                                               | Lung                                                                                      | 12            | (27)                           |
|                                               | Brain                                                                                     | 7             | (16)                           |
| <b>Tumour-directed treatment</b> <sub>1</sub> | <del>Ongoing upon admission</del><br><u>Ongoing upon admission</u><br><u>Chemotherapy</u> | 14            | (32)                           |
|                                               | <u>Hormones</u>                                                                           | <u>3</u>      | <u>(6)</u>                     |
|                                               |                                                                                           | <b>Median</b> | <b>(range)</b>                 |
| <b>Age</b>                                    |                                                                                           | <u>66.7.5</u> | (53-89)                        |
| <b>Survival</b>                               | Overall survival <sup>4</sup> , days from first study entry                               | 50            | (1-500,<br>95% CI: 51-<br>115) |

<sup>1</sup> N = 44, the number of individual patients accounting for the 50 emergency admissions

<sup>2</sup> Breast (3), malignant melanoma (2), gynaecological (2), unspecified (1)

<sup>3</sup> Percentages exceed 100, because due to multiple sites per patients

<sup>4</sup> N=43, one patient was still alive at follow-up

### The emergency admissions

Information about reason for the emergency admission, was ~~that was~~ captured from the ~~registered~~registrations in the medical charts by the attending doctors in the ~~seeing the patients~~ in the emergency department. ~~The~~In the majority of the ~~patient~~cases (n=36, 72%) ~~had~~ two reasons were listed, while a single symptom/condition was given ~~for~~in 14 of the admissions ~~patients only~~ (28%); 86 indications in total. Overall, ~~t~~he most frequent reasons/indications for ~~admittance~~ were gastro-intestinal problems such as nausea/vomiting, diarrhoea and obstipation (n=22/86, 26%), lung problems such as dyspnoea, pleural effusion, pneumonia, embolism (n=17/86, 20%), ~~and~~ pain (n=13/86, 15%), and reduced performance status (n=8/86, 9%). ~~The majority of the patients (NN/%) had multiple symptoms.~~

### Figure 1. Most frequent reasons for the emergency admissions (file uploaded separately)

50% (n=25) of the emergency admissions were administered by a hospital doctor, and 24% (n=12) by the patient's general practitioner (GP) or a GP on call. In 45 cases (90%), patients were admitted from home, four patients came from the hospitals' out-patient clinic, and one from a nursing home. Forty-eight per cent (n=24) were transported by ambulance. In seven cases, an "open return" was established as part of the patient's care plan. However, only two patients were admitted directly to the appropriate hospital unit upon admission, while the remaining had to wait in the emergency room for up to seven hours. Twenty-three patients (46%) had been discharged from hospital less than one month prior to the actual admission ~~admission letters accompanying the patients when admitted, and completed by the doctors who were responsible for the emergency admissions, the most frequently given reason for hospitalization were pain (n=9), nausea/vomiting (n=9), pneumonia, dyspnoea and other lung symptoms (n=13) and reduced performance status (n=5). This corresponded reasonably well~~

1  
2  
3 ~~with the information recorded in the charts in the emergency department, when reviewed by~~  
4 ~~the study coordinators; According to the patients' charts, the single primary reasons for~~  
5 ~~admittance were~~ gastro-intestinal problems such as nausea/vomiting, diarrhoea and  
6 ~~obstipation~~ (n=15), dyspnoea (n=14) and pain (n=7). ~~although t~~The majority of the patients  
7 ~~(NN/%) had multiple symptoms. 50% (n=25) of the emergency admissions were administered~~  
8 ~~by a hospital doctor, and 24% (n=12) by the patient's general practitioner (GP) or a GP on~~  
9 ~~call. In 45 cases (90%), patients were admitted from home, four patients came from the~~  
10 ~~hospitals' out-patient clinic, and one from a nursing home. Forty-eight per cent (n=24) were~~  
11 ~~transported by ambulance. In seven cases, an "open return" was established as part of the~~  
12 ~~patient's care plan. However, only two patients were admitted directly to the appropriate~~  
13 ~~hospital unit upon admission, while the remaining had to wait in the emergency room for up~~  
14 ~~to seven hours. Twenty-three patients (46%) had been discharged from hospital less than one~~  
15 ~~month prior to the actual admission.~~

16  
17  
18  
19  
20  
21  
22  
23  
24  
25  
26  
27  
28  
29  
30  
31  
32  
33  
34 The highest number of emergencies, 18 of 50, occurred on Mondays. Overall, 19 (38%) of the  
35 admissions took place outside regular working hours, defined as 8 p.m. to 5 a.m. on  
36 weekdays. Fourteen of these (74%) occurred from Friday night through Sunday.

37  
38  
39  
40  
41  
42  
43  
44  
45  
46  
47  
48  
49  
50  
51  
52  
53  
54  
55  
56  
57  
58  
59  
60  
Median length of stay was seven days (1-35). Most discharges; 28/45 (64.62%), were to the  
patient's home, eight patients (18%) discharges were to a nursing home, while four-five  
(11%) were transferred to another hospital or a specialized palliative care unit. According to  
the admission letters and patient charts, the most frequent reasons for hospitalization were  
pain (n=9), nausea/vomiting (n=9), pneumonia, lung symptoms including dyspnoea (n=13)  
and reduced performance status (n=5).

## Examinations and interventions

1  
2  
3 X-ray, CT-scans, ~~and~~ ultra-sound examinations and MRIs were performed in 66 (n=33), 48  
4 (n=24), ~~and~~ 24% (n=12) and 8% (n=4) of the cases respectively. Six patients had none of  
5 these procedures done, three patients went through three of these, while one patient had all  
6 four done, prior to abdominal surgery. Seven patients had an electrocardiogram taken during  
7 their stay. Four patients went through surgical procedures; abdominal surgery (n=1), and  
8 insertion of stents (n=2) and a central venous catheter (n=1). None of the patients went  
9 directly to the intensive care unit (ICU) upon admission. One patient however, experienced  
10 severe complications related to dialysis during hospitalization, was admitted to the ICU after  
11 two days and subsequently died.

12  
13  
14 Several standard procedures were performed during hospitalization, with hydration (n=39,  
15 78%), antibiotics (n=21, 42%), and oxygen therapy (n=15, 30%) as the most frequent, Figure  
16  
17  
18  
19  
20  
21  
22  
23  
24  
25  
26  
27  
28  
29  
30  
31  
32  
33  
34  
35  
36  
37  
38  
39  
40  
41  
42  
43  
44  
45  
46  
47  
48  
49  
50  
51  
52  
53  
54  
55  
56  
57  
58  
59  
60

1. Maximum of registered procedures per patient was twelve, while the minimum was three.  
About one-third of the patients (n=15) were seen by an oncologist, while more than 50%  
(n=26) were approached by the hospital palliative team.

**Figure 12. Most frequent ~~standard procedures~~ interventions during hospitalization (file uploaded separately)**

Pain was prominent, and pain-related procedures were performed in all but seven cases. The main reasons for ~~admittance~~ admission in these seven cases were dyspnoea (n=3), reduced performance status (n=2), and problems swallowing (n=2). Two-thirds used strong analgesics such as morphine, fentanyl, or oxycodone upon admission, mostly as ~~depot tablets~~ slow release tablets or patches.

The most frequent pain related interventions were changes in the analgesic regimen (n=24) such as opioid ~~rotation~~ switch, adding a drug-co-analgesic or increasing the dosage. Two

patients had an epidural catheter inserted; one of these also had a coeliacus blockage, and a spinal catheter.

### Symptom assessment, ESAS scores

Both ESAS forms were completed in 76% of the cases. Missing forms were due to death (n=5), discharge earlier than planned and administrative failure (n=7).

Median number of days from admission to the first ESAS was 1 (0-3), with a median of 5 days between assessments (1-20). ESAS no. 2 was completed shortly before discharge; same day (48%) or the day before (12%).

Table 2 displays the ESAS mean scores at inclusion and discharge. Pain at rest and pain at movement was significantly reduced during the stay, with a reduction of 1.7 for both between assessments (p-values <0.01). Highest mean intensity scores at inclusion were found with tiredness (6.1), appetite (5.6) and oral dryness/xerostomia (5.1). Upon discharge, six patients reported a score above three for pain at rest, while 11 patients had a pain score exceeding three for pain at movement.

**Table 2. ESAS scores at inclusion and prior to discharge<sup>1</sup>**

|                  | 1 <sup>st</sup><br>assessment <sup>2</sup> | 2 <sup>nd</sup><br>assessment <sup>2</sup> | Difference in<br>mean scores<br>1 <sup>st</sup> and 2 <sup>nd</sup> ESAS | p-<br>value |
|------------------|--------------------------------------------|--------------------------------------------|--------------------------------------------------------------------------|-------------|
| Symptom          | Mean (SD)                                  | Mean (SD)                                  |                                                                          |             |
| Pain at rest     | 3.2 (2.8)                                  | 1.5 (1.9)                                  | 1.7                                                                      | <.01        |
| Pain at movement | 4.4 (3.1)                                  | 2.7 (2.7)                                  | 1.7                                                                      | <.01        |
| Tiredness        | 6.1 (2.5)                                  | 5.5 (2.6)                                  | 0.6                                                                      | NS          |
| Nausea           | 1.7 (2.5)                                  | 1.3 (2.0)                                  | 0.4                                                                      | NS          |



|                                       |           |           |      |    |
|---------------------------------------|-----------|-----------|------|----|
| Shortness of breath                   | 3.0 (2.9) | 2.8 (3.2) | 0.2  | NS |
| Oral dryness (xerostomia)             | 5.1 (2.7) | 5.2 (2.6) | -0.1 | NS |
| Appetite                              | 5.6 (2.9) | 5.0 (2.4) | 0.6  | NS |
| Anxiety/uneasiness                    | 1.9 (2.5) | 2.3 (2.7) | -0.4 | NS |
| Depression/sadness                    | 2.3 (2.7) | 2.9 (3.0) | -0.6 | NS |
| “Overall, how are you feeling today?” | 4.5 (2.3) | 4.2 (2.1) | 0.3  | NS |

<sup>1</sup> Numerical rating scale (0-10) with higher scores implying higher symptom intensity

<sup>2</sup> N varies between 38 and 34, due to missing items on some of the forms

Mean ESAS scores at inclusion in the 12 cases in which the second form was not completed were compared with scores from those who completed both. No significant differences were found.

### The patient interviews

Patients were asked to mention the two most bothersome symptoms leading to the hospitalization. Gastrointestinal symptoms including nausea/vomiting, diarrhoea and appetite loss (n=24, 48%), fatigue (n=19, 38%), pain (n=18, 38%), and dyspnoea (n=10, 20%) were the most frequent reasons according to the patients. In most cases (n=32, 64%), patients said the symptoms had developed over several days, and this was reported by all of the 18 patients ose who were admitted on a Monday. Six patients (12%) reported a more acute onset with symptoms developing during a few hours. Four of these patients came to the hospital outside normal working hours. Nineteen patients (38%) received regular medical care at home from the community health system, such as nursing services and practical help with household ehoresdomestic assistance, or both. When asked about preference for care the majority of patients (n=33, 66%) preferred hospital admission to other places in the actual situation. Nine (18%) said they would have liked to receive medical treatment at home, given that necessary

resources and equipment were available, [while four \(8%\) would have preferred a nursing home](#).

Free comments were provided in 44 interviews. Seven patients (16%) perceived the delays in the emergency unit as tiring and unnecessary, while another seven (16%) found this acceptable. Two patients (5%) specifically stated that they would have preferred direct admission to the appropriate hospital unit, while another two (5%) had a desire to go directly to the palliative care unit. In ten interviews (23%), patients said they felt safer at hospital than at home given the actual situation. Seven of these (70%) were 65 years or older, but only one was living alone. ~~However, some~~ Four (10%) expressed concerns about the caregiver burden imposed on their partner. The most frequently raised comment in the interviews (n=11, 25%) was related to doubts whether the home care services had competence and expertise to handle the situation.

Nevertheless, ~~many ten~~ patients (23%) said they would have preferred to get simple procedures such as intravenous nutrition and hydration at home. In their opinion, specialized care teams and home visits by their GP were the most important actions to prevent emergency admissions.

## DISCUSSION

This small, descriptive study from two acute-care Norwegian hospitals serving local, urban areas shows that relatively simple procedures were performed in most of the emergency cases. Standard interventions such as hydration, antibiotics, and oxygen therapy were most common, corresponding well with the most frequent reasons for admission. In many cases, these procedures may well be administered in the primary health care sector.

1  
2  
3 Pain, gastro-intestinal and respiratory problems were prominent, well in line with other  
4  
5 studies of emergency admissions[4,5,2021,2122]. These are frequent symptoms in advanced  
6  
7 cancer patients, and may indicate disease progression. One study demonstrated a significant  
8  
9 relationship between signs of disease progression and short term mortality (<90 and <180  
10  
11 days) in symptomatic cancer patients coming to the ER[2122], in line with other  
12  
13 reports[2223,2324]. Although the present study was too small to perform valid analyses of a  
14  
15 possible relationship between symptoms and survival, our sample consisted of cancer patients  
16  
17 in the palliative phase of disease, and more than 50% were dead 90 days after discharge. This  
18  
19 suggests that standard medical procedures were indicated for most of the patients, and more  
20  
21 advanced procedures in some cases only.  
22  
23  
24  
25  
26

27  
28 Thirty-eight per cent of the admissions were outside normal working hours, a lower  
29  
30 proportion than reported elsewhere[2021]. In most cases, patients said that symptoms had  
31  
32 developed over time. Monday had the highest percentage of emergency admissions as found  
33  
34 by others[2021], which corresponds to a gradual onset of symptoms, as reported by all of the  
35  
36 patients admitted on Mondays. It may also be that patients tried to avoid going in on  
37  
38 weekends and waited until Monday before contacting the hospital or the GP.  
39  
40  
41  
42

43  
44 Many common symptoms are bothersome and distressing and known to cause considerable  
45  
46 anxiety in patients, and in relatives. Thus, it should be remembered that causes other than  
47  
48 strict medical, somatic indications may lead to hospital admissions, e.g. reduced performance  
49  
50 status, frailty, loneliness and psychological distress that often coexist. Some patients  
51  
52 commented that they felt safer at hospital than at home, and that they wanted to reduce the  
53  
54 burden imposed on their family by the disease. Causes like this may be more common in  
55  
56 smaller hospitals serving a well-defined area compared to larger university clinics. In our  
57  
58  
59  
60

1  
2  
3 opinion, maybe the most important issue raised by this study is not whether hospital  
4 admission was indicated per se, but if hospital admission as an emergency case was most  
5 appropriate for getting necessary medical care. We also believe however, that a higher level  
6 of specialist palliative care competence in the home care services and closer collaboration  
7 between these services and the hospital may reduce the need for emergency  
8 [admittancesadmissions](#).  
9  
10  
11  
12  
13  
14  
15  
16  
17

18 This also relates to the fact that about 50% of the admissions were administered by a hospital  
19 doctor, twice as many as by GPs (24%). The standard pathway for hospital admissions in  
20 Norway is through the family GP, unless there is an emergency. The fact that our sample  
21 consisted of palliative care patients with an affiliation to the local hospital, may explain why  
22 the hospital doctors were so frequently contacted. It is noteworthy; however, that a home visit  
23 by a medical doctor was mentioned as the most wanted intervention that could possibly have  
24 prevented the emergency admission. Shorter hospital stays and more people living longer at  
25 home with advanced disease, represent a challenge for the primary health care sector,  
26 specifically so for the GPs[[2425,2526](#)] as they are crucial in the follow-up and care for  
27 patients with advanced cancer outside hospital[[2627](#)]. One study found that a higher number  
28 of visits to the family doctor was inversely associated with the number of visits to the ER in  
29 patients dying from cancer[[2728](#)].  
30  
31  
32  
33  
34  
35  
36  
37  
38  
39  
40  
41  
42  
43  
44  
45  
46

47 In our opinion, this points to two important aspects related to palliative care; namely that it is  
48 misconstrued as end-of-life care only[[4011](#)], and that it should be integrated into standard  
49 oncology upon the diagnosis of metastatic or advanced cancer. WHO emphasize that  
50 palliative care is applicable early in the course of illness[[2829](#)] due to systematic approach to  
51 symptom relief, enhanced quality of life of patient and caregivers, less use of emergency care  
52  
53  
54  
55  
56  
57  
58  
59  
60

1  
2  
3 services and a timelier referral to specialized palliative care, that often takes place too  
4  
5 late[[11](#),[2021](#),[2930](#)].  
6  
7

8  
9  
10 The fact that many patients with advanced cancer see acute-care providers, makes systematic  
11  
12 follow-up less common, and means that collaborative care plans across organizational levels  
13  
14 are not available, even if needed. Home care of patients with advanced cancer should be taken  
15  
16 care of by specialist teams with easy access to hospital based palliative care specialists, in  
17  
18 close collaboration with the family doctor. Pain related interventions were performed in  
19  
20 almost all patients, and there was a significant decline in the mean pain scores (mean 1.7) on  
21  
22 the ESAS from admission to discharge. A recent study in more than 200 patients showed that  
23  
24 a decrease of 1.2 units in the ESAS pain score constituted a clinically relevant  
25  
26 improvement[[3031](#)]. A change in the analgesic regimen was the most frequent procedure, and  
27  
28 it is reason to believe that this and other simple procedures could have been performed at  
29  
30 home, if the resources in the form of necessary competence were available. This may reduce  
31  
32 the dependency on the local hospital and reduce the number of emergency admissions.  
33  
34  
35  
36  
37

38  
39 One limitation is the lack of information about performance status and current disease status  
40  
41 at admission, both important predictors of survival and disease progression[[2122](#)]. This might  
42  
43 have provided more valid information about the necessity of being admitted as an emergency  
44  
45 case. The majority of patients had metastatic disease and few received tumour-directed  
46  
47 treatment upon admission, indicating that the majority were in the late stages of disease.  
48  
49 Additionally, lung symptoms, reported as an independent predictor of death within 90 and 180  
50  
51 days[[2122-2324](#)] were among the most frequent reasons for admission. Although some  
52  
53 patients needed more advanced procedures (surgery, [CTscans](#), [MRIs](#) ~~and~~ [EKGs](#)), relatively  
54  
55 simple procedures like hydration, [antibiotics](#) and change in analgesic ~~sa~~ were most common.  
56  
57  
58  
59  
60

1  
2  
3 This may be taken to indicate that an emergency hospital admission was necessary for some  
4 patients, but not for all. To perform a valid investigation of the “true” proportion of patients  
5 needing emergency ~~care~~admissions, a larger study with thorough objective examinations, and  
6 detailed registrations of all interventions and a close follow-up is necessary, which was  
7 beyond the scope of this descriptive study. This is also related to the ~~Another~~ limitation is  
8 caused by the small sample size, and the fact that the study was confined to two hospitals  
9 only. The first does not allow for advanced statistics and sub-group comparisons, while the  
10 second may limit the generalizability. On the other hand, there are many relatively small acute  
11 care hospitals in Norway ~~as in many other countries~~, servicing a limited catchment area with a  
12 well-organized primary health care sector. It could be argued that more knowledge about the  
13 extent and quality of the home care nursing services, and the amount of patients’ contact with  
14 the GP would have provided important information about the need for an emergency  
15 admission. This is true, but we also believe that a small study like this makes the ~~rendering the~~  
16 findings relevant to consider in discharge planning and palliative care follow-up, as was our  
17 intention with the present study. Also, the fact that all consecutive emergency cases in the  
18 actual time period were considered for inclusion is a major strength, in our opinion.  
19  
20 Furthermore, quantitative registrations combined with interviews give a ~~good~~better picture of  
21 the patients’ experiences, than registry-based studies alone.

22  
23  
24  
25  
26  
27  
28  
29  
30  
31  
32  
33  
34  
35  
36  
37  
38  
39  
40  
41  
42  
43  
44  
45 The fact that close to 50% of our patients had been discharged from hospital less than one  
46 month prior to the actual admission emphasizes the need to improve the continuity of care,  
47 through a systematic follow-up and treatment plan, which are cornerstones of palliative care.  
48  
49 This may actually have a double effect, preventing a rapid development in symptom intensity  
50 and improving the feeling of safety for patients and family, thereby reducing the need for  
51 emergency admissions.  
52  
53  
54  
55  
56  
57  
58  
59  
60

## CONCLUSION

Emergency admissions may represent stressful events for patients and relatives. This study showed that many patients needed simple procedures only. About two-thirds preferred hospital admission to other places of care, and about one-fourth expressed that they felt the feeling of being safe in the hospital was prominent in the actual situation. Higher levels of expertise, easier access to medical doctors outside hospital and better lines of cooperation between hospitals and the primary health care services may reduce need for emergency hospitalizations/admissions.

## ACKNOWLEDGEMENTS

This project was supported in part by a grant from the Department of Research at Østfold Hospital Trust, Norway. The authors want to thank Marit S. Jordhøy, Norway, who gave valuable advice in the protocol and manuscript writing, and Irmelin Bergh who helped out in the initial phase of the study planning. Special thanks are also given to the study coordinators at the participating centres and the patients who took part in the study.

## REFERENCES

1. Krefregisteret, Cancer Registry of Norway. Homepage: <http://www.krefregisteret.no/en/>. (2011, Accessed Nov 2012)
2. Verdecchia A, Francisci S, Brenner H, et al. Recent cancer survival in Europe: a 2000-02 period analysis of EURO CARE-4 data. *Lancet Oncol* 2007;**9**:784-796.
3. Earle CC, Park ER, Lai B, et al. Identifying potential indicators of the quality of end-of-life cancer care from administrative data. *J Clin Oncol* 2003;**21**:1133-1138.
4. Yates M, Barrett A. Oncological emergency admissions to the Norfolk and Norwich University Hospital: an audit of current arrangements and patient satisfaction. *Clin Oncol (R Coll Radiol)* 2009;**3**:226-233.
5. Barbera L, Taylor C, Dudgeon D. Why do patients with cancer visit the emergency department near the end of life? *CAMJ* 2010;**182**(6):563-568
- 5-6. Earle CC, Neville BA, Landrum MB, et al. Trends in the aggressiveness of cancer care near the end of life. *J Clin Oncol* 2004;**2**:315-321
- 6-7. Huang J, Boyd C, Tyldesley S, et al. Time spent in hospital in the last six months of life in patients who died of cancer in Ontario. *J Clin Oncol* 2002;**6**:1584-1592.
- 7-8. Barbera L, Paszat L, and Chartier C. Indicators of poor quality end-of-life cancer care in Ontario. *J Palliat Care* 2006;**1**:12-17.
- 8-9. Ho TH, Barbera L, Saskin R, et al. Trends in the aggressiveness of end-of-life cancer care in the universal health care system of Ontario, Canada. *J Clin Oncol* 2011; **12**: 1587-1591.
- 9-10. Earle CC, Landrum MB, Souza JM, et al. Aggressiveness of cancer care near the end of life: is it a quality-of-care issue? *J Clin Oncol* 2008; **23**: 3860-3866.
- 10-11. Smith TJ, Temin S, Alesi ER, et al. American society of clinical oncology provisional clinical opinion: the integration of palliative care into standard oncology care. *J Clin Oncol* 2012;**8**:880-887.
- 11-12. Bruera E, and Hui D. Integrating supportive and palliative care in the trajectory of cancer: establishing goals and models of care. *J Clin Oncol* 2010; **25**: 4013-4017.
- 12-13. Dudgeon DJ, Knott C, Eichholz M, et al. Palliative Care Integration Project (PCIP) quality improvement strategy evaluation. *J Pain Symptom Manage* 2008;**6**:573-582.
- 13-14. Higginson IJ, and Evans CJ. What is the evidence that palliative care teams improve outcomes for cancer patients and their families? *Cancer J* 2010;**5**:423-435.
- 14-15. Brumley R, Enguidanos S, Jamison P, et al. Increased satisfaction with care and lower costs: results of a randomized trial of in-home palliative care. *J Am Geriatr Soc* 2007;**7**:993-1000.



- 1  
2  
3 | 15-16. Bakitas M, Lyons KD, Hegel MT, et al. Effects of a palliative care intervention  
4 | on clinical outcomes in patients with advanced cancer: the Project ENABLE II  
5 | randomized controlled trial. *JAMA* 2009;7:741-749.  
6  
7 | 16-17. International Classification of Diseases ICD-10. Home page:  
8 | <http://www.who.int/classifications/icd/en/>, (2010, Accessed Nov 2012).  
9  
10 | 17-18. Norwegian Cause of Death Registry. Home page:  
11 | [http://www.ssb.no/english/subjects/03/01/10/dodsarsak\\_en/](http://www.ssb.no/english/subjects/03/01/10/dodsarsak_en/). (2010, Accessed Nov  
12 | 2012).  
13  
14 | 18-19. Nekolaichuk C, Watanabe S, and Beaumont C. The Edmonton Symptom  
15 | Assessment System: a 15-year retrospective review of validation studies (1991-2006).  
16 | *Palliat Med* 2008;2:111-122.  
17  
18 | 19-20. Bruera E, Kuehn N, Miller MJ, et al. The Edmonton Symptom Assessment  
19 | System (ESAS): a simple method for the assessment of palliative care patients. *J*  
20 | *Palliat Care* 1991;2:6-9.  
21  
22 | 20-21. Mayer DK, Travers D, Wyss A, et al. Why do patients with cancer visit  
23 | emergency departments? Results of a 2008 population study in North Carolina. *J Clin*  
24 | *Oncol* 2011;19:2683-2688.  
25  
26 | 21-22. Geraci JM, Tsang W, Valdres RV, et al. Progressive disease in patients with  
27 | cancer presenting to an emergency room with acute symptoms predicts short-term  
28 | mortality. *Support Care Cancer* 2006;10:1038-1045.  
29  
30 | 22-23. Escalante CP, Martin CG, Elting LS, et al. Identifying risk factors for imminent  
31 | death in cancer patients with acute dyspnea. *J Pain Symptom Manage* 2000;5:318-325.  
32  
33 | 23-24. Viganò A, Dorgan M, Bruera E, et al. The relative accuracy of the clinical  
34 | estimation of the duration of life for patients with end of life cancer. *Cancer*  
35 | 1999;1:170-176.  
36  
37 | 24-25. Menten J, and de Leppeleire J. Emergency hospital admission for pain in  
38 | palliative patients: a crucial role for general practitioners. *Eur J Gen Pract*  
39 | 2006;3:133-134.  
40  
41 | 25-26. Wiese CH, Bartels UE, Ruppert D, et al. Treatment of palliative care  
42 | emergencies by prehospital emergency physicians in Germany: an interview based  
43 | investigation. *Palliat Med* 2009;4:369-373.  
44  
45 | 26-27. Wiese CH, Bartels UE, Marczyńska K, et al. Quality of out-of-hospital  
46 | palliative emergency care depends on the expertise of the emergency medical team--a  
47 | prospective multi-centre analysis. *Support Care Cancer* 2009; 12: 1499-1506.  
48  
49 | 27-28. Burge F, Lawson B, and Johnston G. Family physician continuity of care and  
50 | emergency department use in end-of-life cancer care. *Med Care* 2003;41:992-1001.  
51  
52 | 28-29. World Health Organization. Homepage  
53 | <http://www.who.int/cancer/palliative/definition/en/>. (2011, accessed Nov 2012).  
54  
55  
56  
57  
58  
59  
60

1  
2  
3 | ~~29~~.<sup>30</sup> Daugherty CK, and Steensma DP. Overcoming obstacles to hospice care: an  
4 ethical examination of inertia and inaction. *J Clin Oncol* 2003;**21**(9 Suppl):42s-45s.  
5

6 | ~~30~~.<sup>31</sup> Bedard G, Zeng L, Zhang L, et al. Minimal Clinically Important Differences in  
7 the Edmonton Symptom Assessment System in Patients With Advanced Cancer. *J*  
8 *Pain Symptom Manage* 2012. Epub ahead of print, Nov 21, doi:  
9 10.1016/j.jpainsymman.2012.07.022.  
10  
11  
12  
13  
14  
15  
16  
17  
18  
19  
20  
21  
22  
23  
24  
25  
26  
27  
28  
29  
30  
31  
32  
33  
34  
35  
36  
37  
38  
39  
40  
41  
42  
43  
44  
45  
46  
47  
48  
49  
50  
51  
52  
53  
54  
55  
56  
57  
58  
59  
60

For peer review only

1  
2  
3  
4  
5  
6  
7  
8  
9  
10  
11  
12  
13  
14  
15  
16  
17  
18  
19  
20  
21  
22  
23  
24  
25  
26  
27  
28  
29  
30  
31  
32  
33  
34  
35  
36  
37  
38  
39  
40  
41  
42  
43  
44  
45  
46  
47  
48  
49  
50  
51  
52  
53  
54  
55  
56  
57  
58  
59  
60

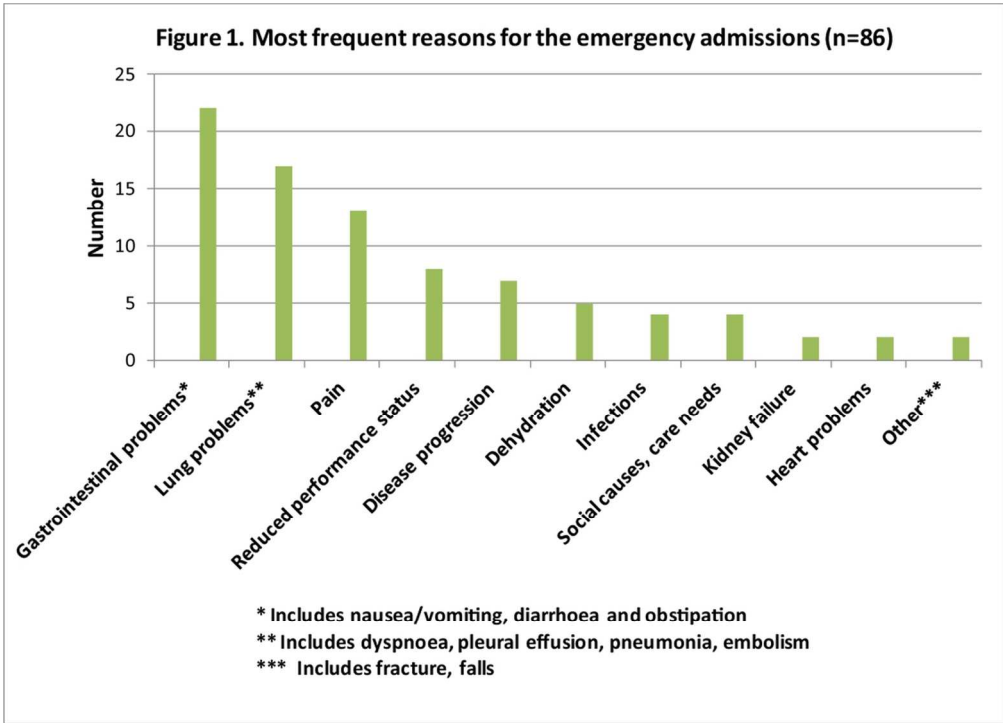

124x90mm (300 x 300 DPI)

View only

1  
2  
3  
4  
5  
6  
7  
8  
9  
10  
11  
12  
13  
14  
15  
16  
17  
18  
19  
20  
21  
22  
23  
24  
25  
26  
27  
28  
29  
30  
31  
32  
33  
34  
35  
36  
37  
38  
39  
40  
41  
42  
43  
44  
45  
46  
47  
48  
49  
50  
51  
52  
53  
54  
55  
56  
57  
58  
59  
60

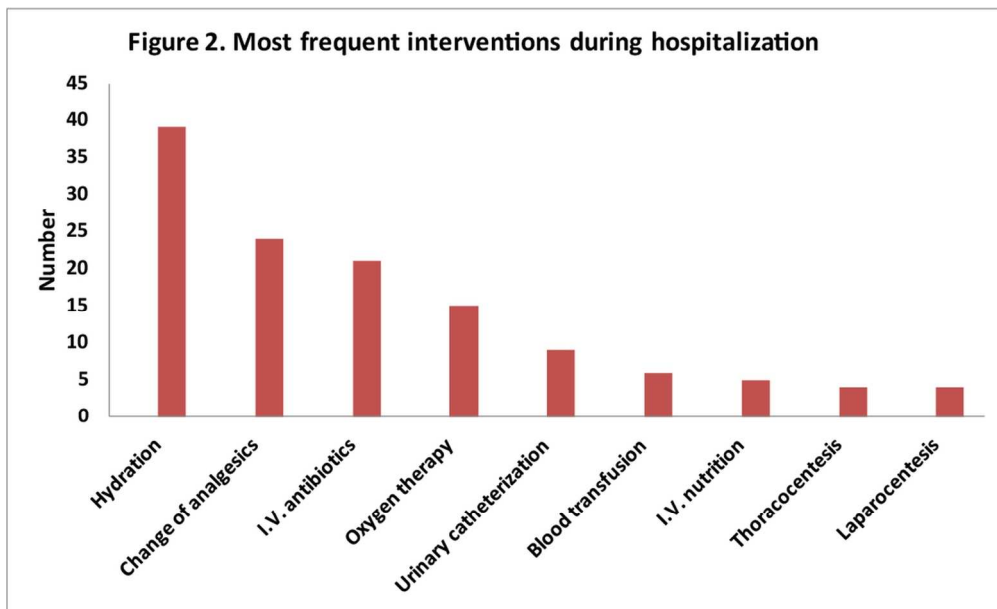

148x90mm (300 x 300 DPI)

Review only

STROBE Statement—Checklist of items that should be included in reports of *cross-sectional studies*

|                              | Item No | Recommendation                                                                                                                                                                                                                                                                                                                                                                                                |
|------------------------------|---------|---------------------------------------------------------------------------------------------------------------------------------------------------------------------------------------------------------------------------------------------------------------------------------------------------------------------------------------------------------------------------------------------------------------|
| <b>Title and abstract</b>    | 1 X     | (a) Indicate the study's design with a commonly used term in the title or the abstract<br>(b) Provide in the abstract an informative and balanced summary of what was done and what was found                                                                                                                                                                                                                 |
| <b>Introduction</b>          |         |                                                                                                                                                                                                                                                                                                                                                                                                               |
| Background/rationale         | 2 X     | Explain the scientific background and rationale for the investigation being reported                                                                                                                                                                                                                                                                                                                          |
| Objectives                   | 3 X     | State specific objectives, including any prespecified hypotheses                                                                                                                                                                                                                                                                                                                                              |
| <b>Methods</b>               |         |                                                                                                                                                                                                                                                                                                                                                                                                               |
| Study design                 | 4 X     | Present key elements of study design early in the paper                                                                                                                                                                                                                                                                                                                                                       |
| Setting                      | 5 X     | Describe the setting, locations, and relevant dates, including periods of recruitment, exposure, follow-up, and data collection                                                                                                                                                                                                                                                                               |
| Participants                 | 6 X     | (a) Give the eligibility criteria, and the sources and methods of selection of participants                                                                                                                                                                                                                                                                                                                   |
| Variables                    | 7 X     | Clearly define all outcomes, exposures, predictors, potential confounders, and effect modifiers. Give diagnostic criteria, if applicable                                                                                                                                                                                                                                                                      |
| Data sources/<br>measurement | 8* X    | For each variable of interest, give sources of data and details of methods of assessment (measurement). Describe comparability of assessment methods if there is more than one group                                                                                                                                                                                                                          |
| Bias                         | 9 X     | Describe any efforts to address potential sources of bias                                                                                                                                                                                                                                                                                                                                                     |
| Study size                   | 10 X    | Explain how the study size was arrived at                                                                                                                                                                                                                                                                                                                                                                     |
| Quantitative variables       | 11 X    | Explain how quantitative variables were handled in the analyses. If applicable, describe which groupings were chosen and why                                                                                                                                                                                                                                                                                  |
| Statistical methods          | 12 X    | (a) Describe all statistical methods, including those used to control for confounding<br>(b) Describe any methods used to examine subgroups and interactions<br>(c) Explain how missing data were addressed<br>(d) If applicable, describe analytical methods taking account of sampling strategy<br>(e) Describe any sensitivity analyses                                                                    |
| <b>Results</b>               |         |                                                                                                                                                                                                                                                                                                                                                                                                               |
| Participants                 | 13* X   | (a) Report numbers of individuals at each stage of study—eg numbers potentially eligible, examined for eligibility, confirmed eligible, included in the study, completing follow-up, and analysed<br>(b) Give reasons for non-participation at each stage<br>(c) Consider use of a flow diagram                                                                                                               |
| Descriptive data             | 14* X   | (a) Give characteristics of study participants (eg demographic, clinical, social) and information on exposures and potential confounders<br>(b) Indicate number of participants with missing data for each variable of interest                                                                                                                                                                               |
| Outcome data                 | 15* X   | Report numbers of outcome events or summary measures                                                                                                                                                                                                                                                                                                                                                          |
| Main results                 | 16 X    | (a) Give unadjusted estimates and, if applicable, confounder-adjusted estimates and their precision (eg, 95% confidence interval). Make clear which confounders were adjusted for and why they were included<br>(b) Report category boundaries when continuous variables were categorized<br>(c) If relevant, consider translating estimates of relative risk into absolute risk for a meaningful time period |
| Other analyses               | 17 X    | Report other analyses done—eg analyses of subgroups and interactions, and sensitivity analyses                                                                                                                                                                                                                                                                                                                |

| <b>Discussion</b>        |      |                                                                                                                                                                            |
|--------------------------|------|----------------------------------------------------------------------------------------------------------------------------------------------------------------------------|
| Key results              | 18 X | Summarise key results with reference to study objectives                                                                                                                   |
| Limitations              | 19 X | Discuss limitations of the study, taking into account sources of potential bias or imprecision. Discuss both direction and magnitude of any potential bias                 |
| Interpretation           | 20 X | Give a cautious overall interpretation of results considering objectives, limitations, multiplicity of analyses, results from similar studies, and other relevant evidence |
| Generalisability         | 21 X | Discuss the generalisability (external validity) of the study results                                                                                                      |
| <b>Other information</b> |      |                                                                                                                                                                            |
| Funding                  | 22 X | Give the source of funding and the role of the funders for the present study and, if applicable, for the original study on which the present article is based              |

\*Give information separately for exposed and unexposed groups.

**Note:** An Explanation and Elaboration article discusses each checklist item and gives methodological background and published examples of transparent reporting. The STROBE checklist is best used in conjunction with this article (freely available on the Web sites of PLoS Medicine at <http://www.plosmedicine.org/>, Annals of Internal Medicine at <http://www.annals.org/>, and Epidemiology at <http://www.epidem.com/>). Information on the STROBE Initiative is available at [www.strobe-statement.org](http://www.strobe-statement.org).
